# Supplementary material for: Robust analysis of prokaryotic pangenome gene gain and loss rates with Panstripe
Source: HighWire-hosted journal article supplement (doi:10.1101/gr.277340.122), 2023-01-01

core genome  
phylogeny

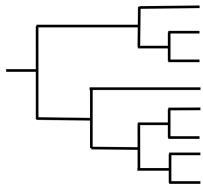

gene presence/  
absence matrix

genes

| genomes |   |   |   |   |   |   |   |   |     |
|---------|---|---|---|---|---|---|---|---|-----|
| 1       | 0 | 1 | 0 | 0 | 1 | 0 | 1 | 1 |     |
| 1       | 0 | 1 | 0 | 0 | 1 | 0 | 1 | 0 | ... |
| 0       | 0 | 1 | 0 | 1 | 1 | 0 | 1 | 1 | ▶   |
| 1       | 0 | 1 | 0 | 0 | 1 | 1 | 1 | 1 |     |
|         |   |   |   |   |   |   |   |   | ⋮   |

▼

ancestral state  
reconstruction

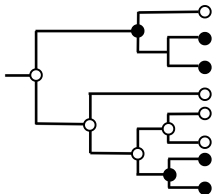

fit compound  
Poisson GLM

# gene  
gain/loss  
events

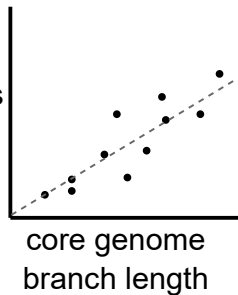

Supplement: Supplemental_Code_0.1.0.tar.gz.zip [file panstripe.drawio.pdf › panstripe-manuscript-0.1.0/figures/panstripe.drawio.pdf]
