# Supplementary material for: Robust analysis of prokaryotic pangenome gene gain and loss rates with Panstripe
Source: HighWire-hosted journal article supplement (doi:10.1101/gr.277340.122), 2023-01-01
Supplement: Supplemental_Code_0.1.0.tar.gz.zip [file simulation_sampling_bias_summary.pdf › panstripe-manuscript-0.1.0/figures/simulation_sampling_bias_summary.pdf]

estimated parameter value (scaled)

panstripe

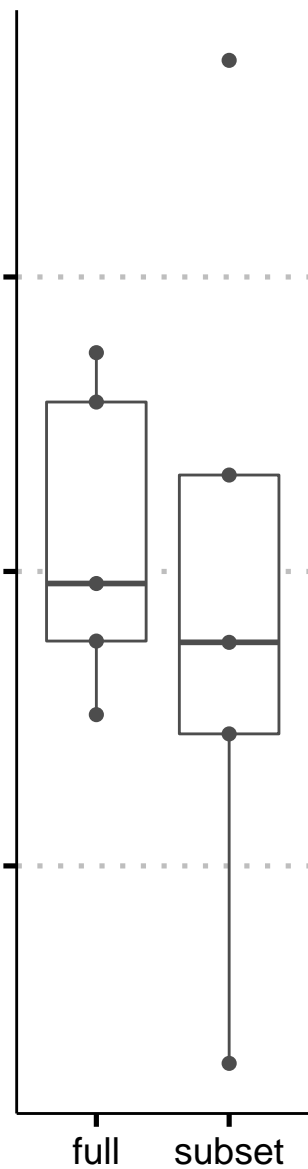

Zamani-Dahaj

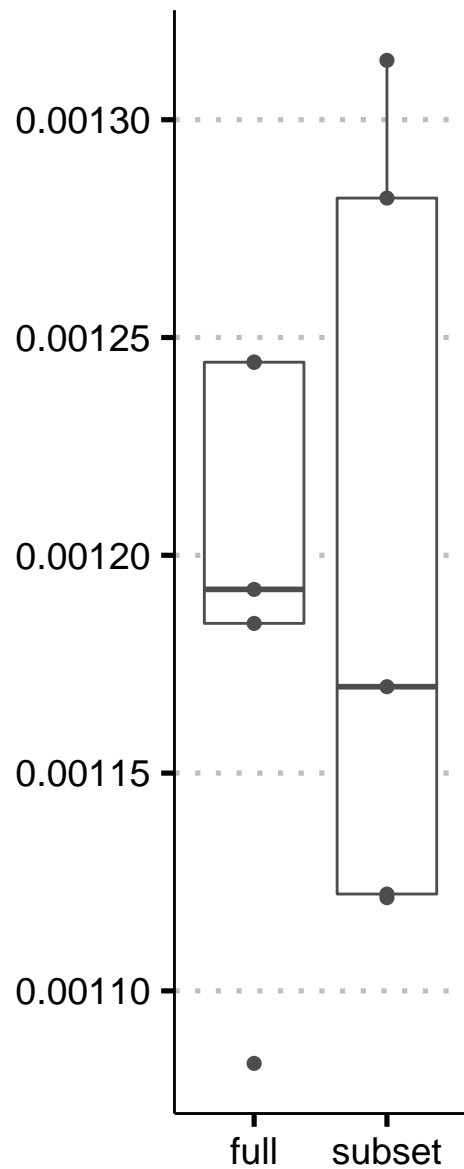

Collins

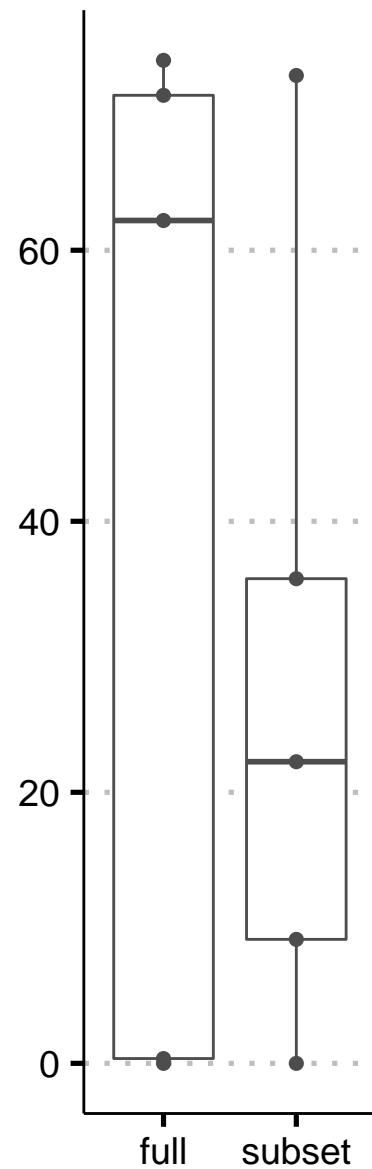

panicimage

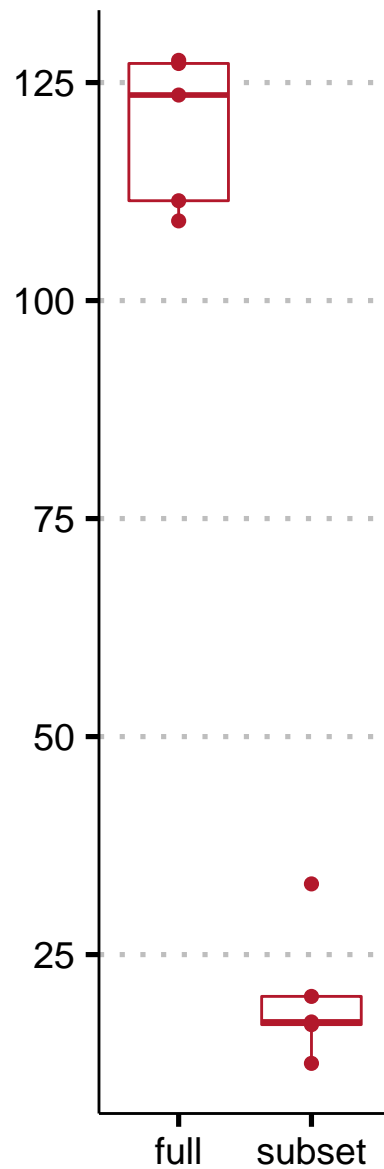

Heaps

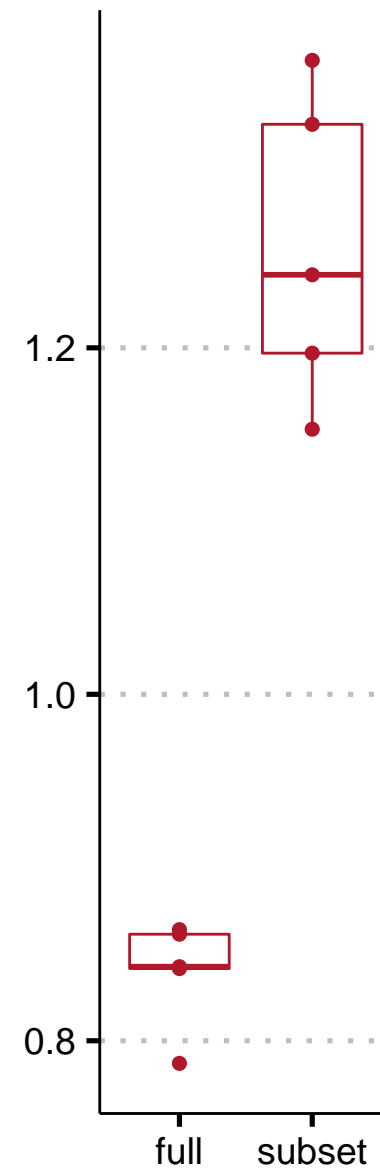

accumulation  
curve

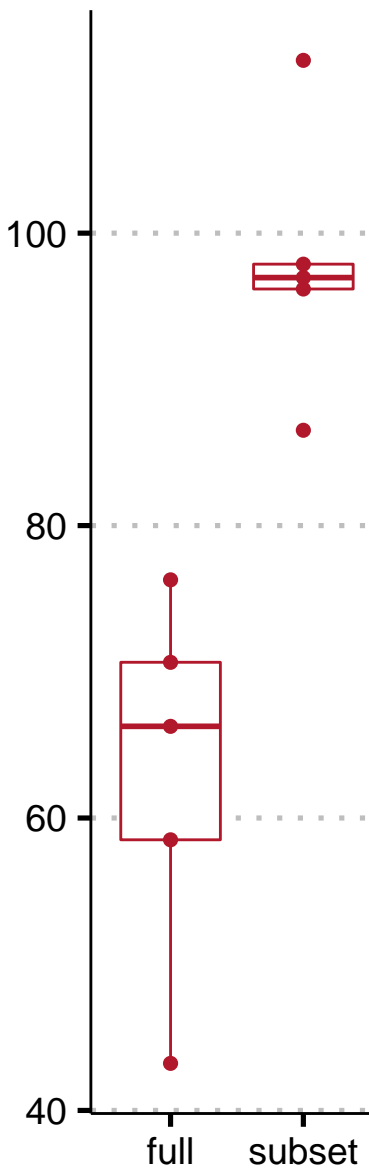

not significant  
significant
