# Supplementary figures and images for: Robust analysis of prokaryotic pangenome gene gain and loss rates with Panstripe
Source: HighWire-hosted journal article supplement (doi:10.1101/gr.277340.122), 2023-01-01

Invasive

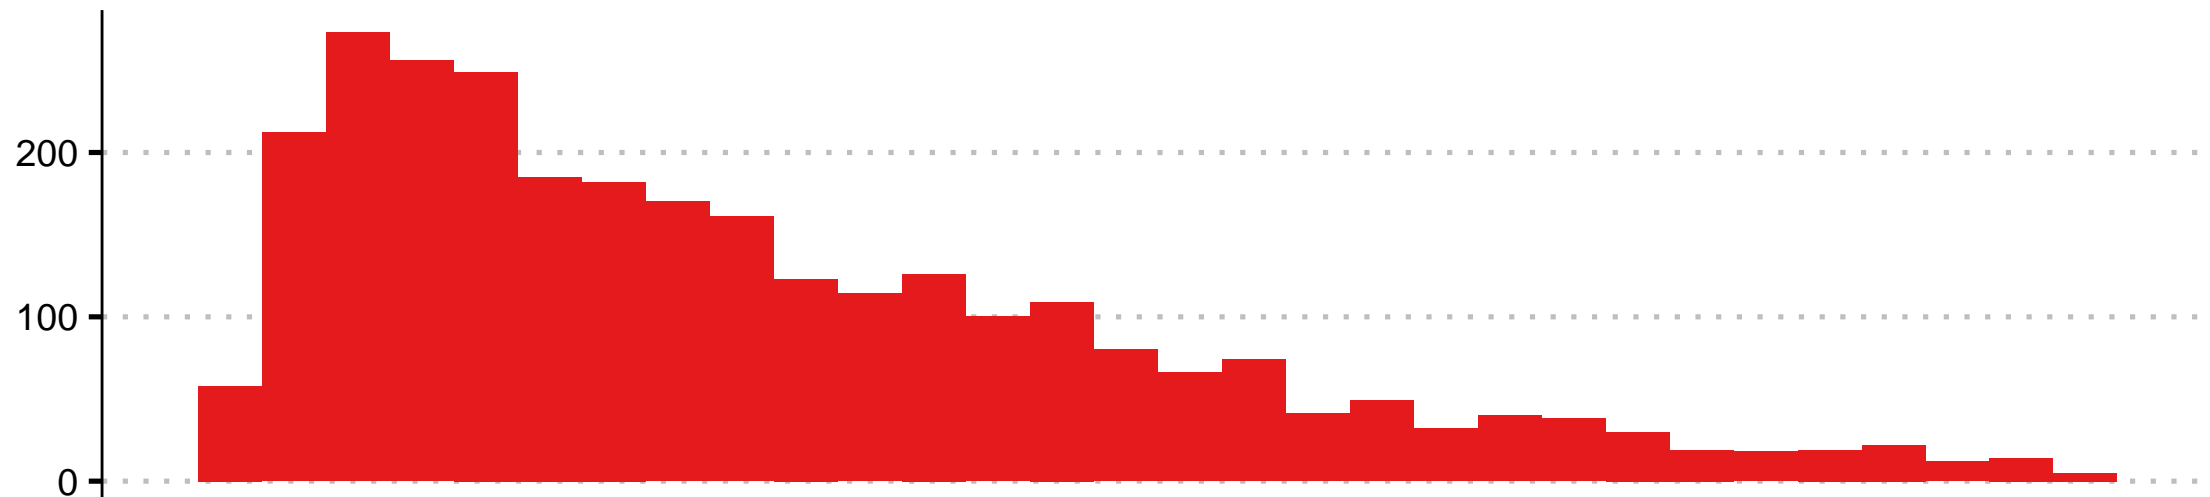

Not invasive

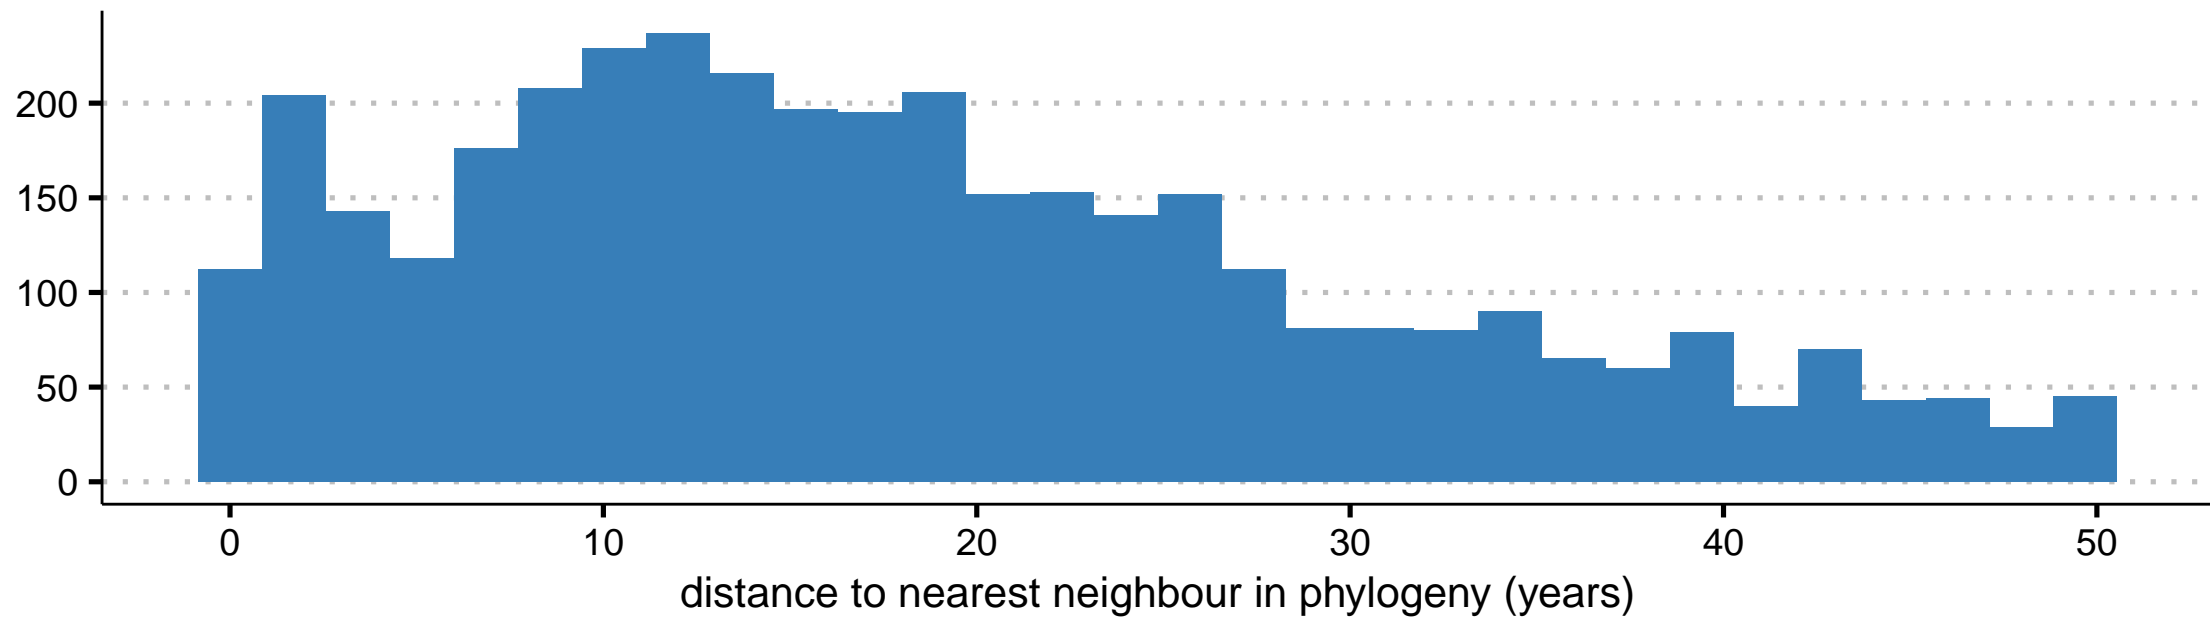

Supplement: Supplemental_Code_0.1.0.tar.gz.zip [file GPSC_nn_histogram.pdf › panstripe-manuscript-0.1.0/figures/GPSC_nn_histogram.pdf]

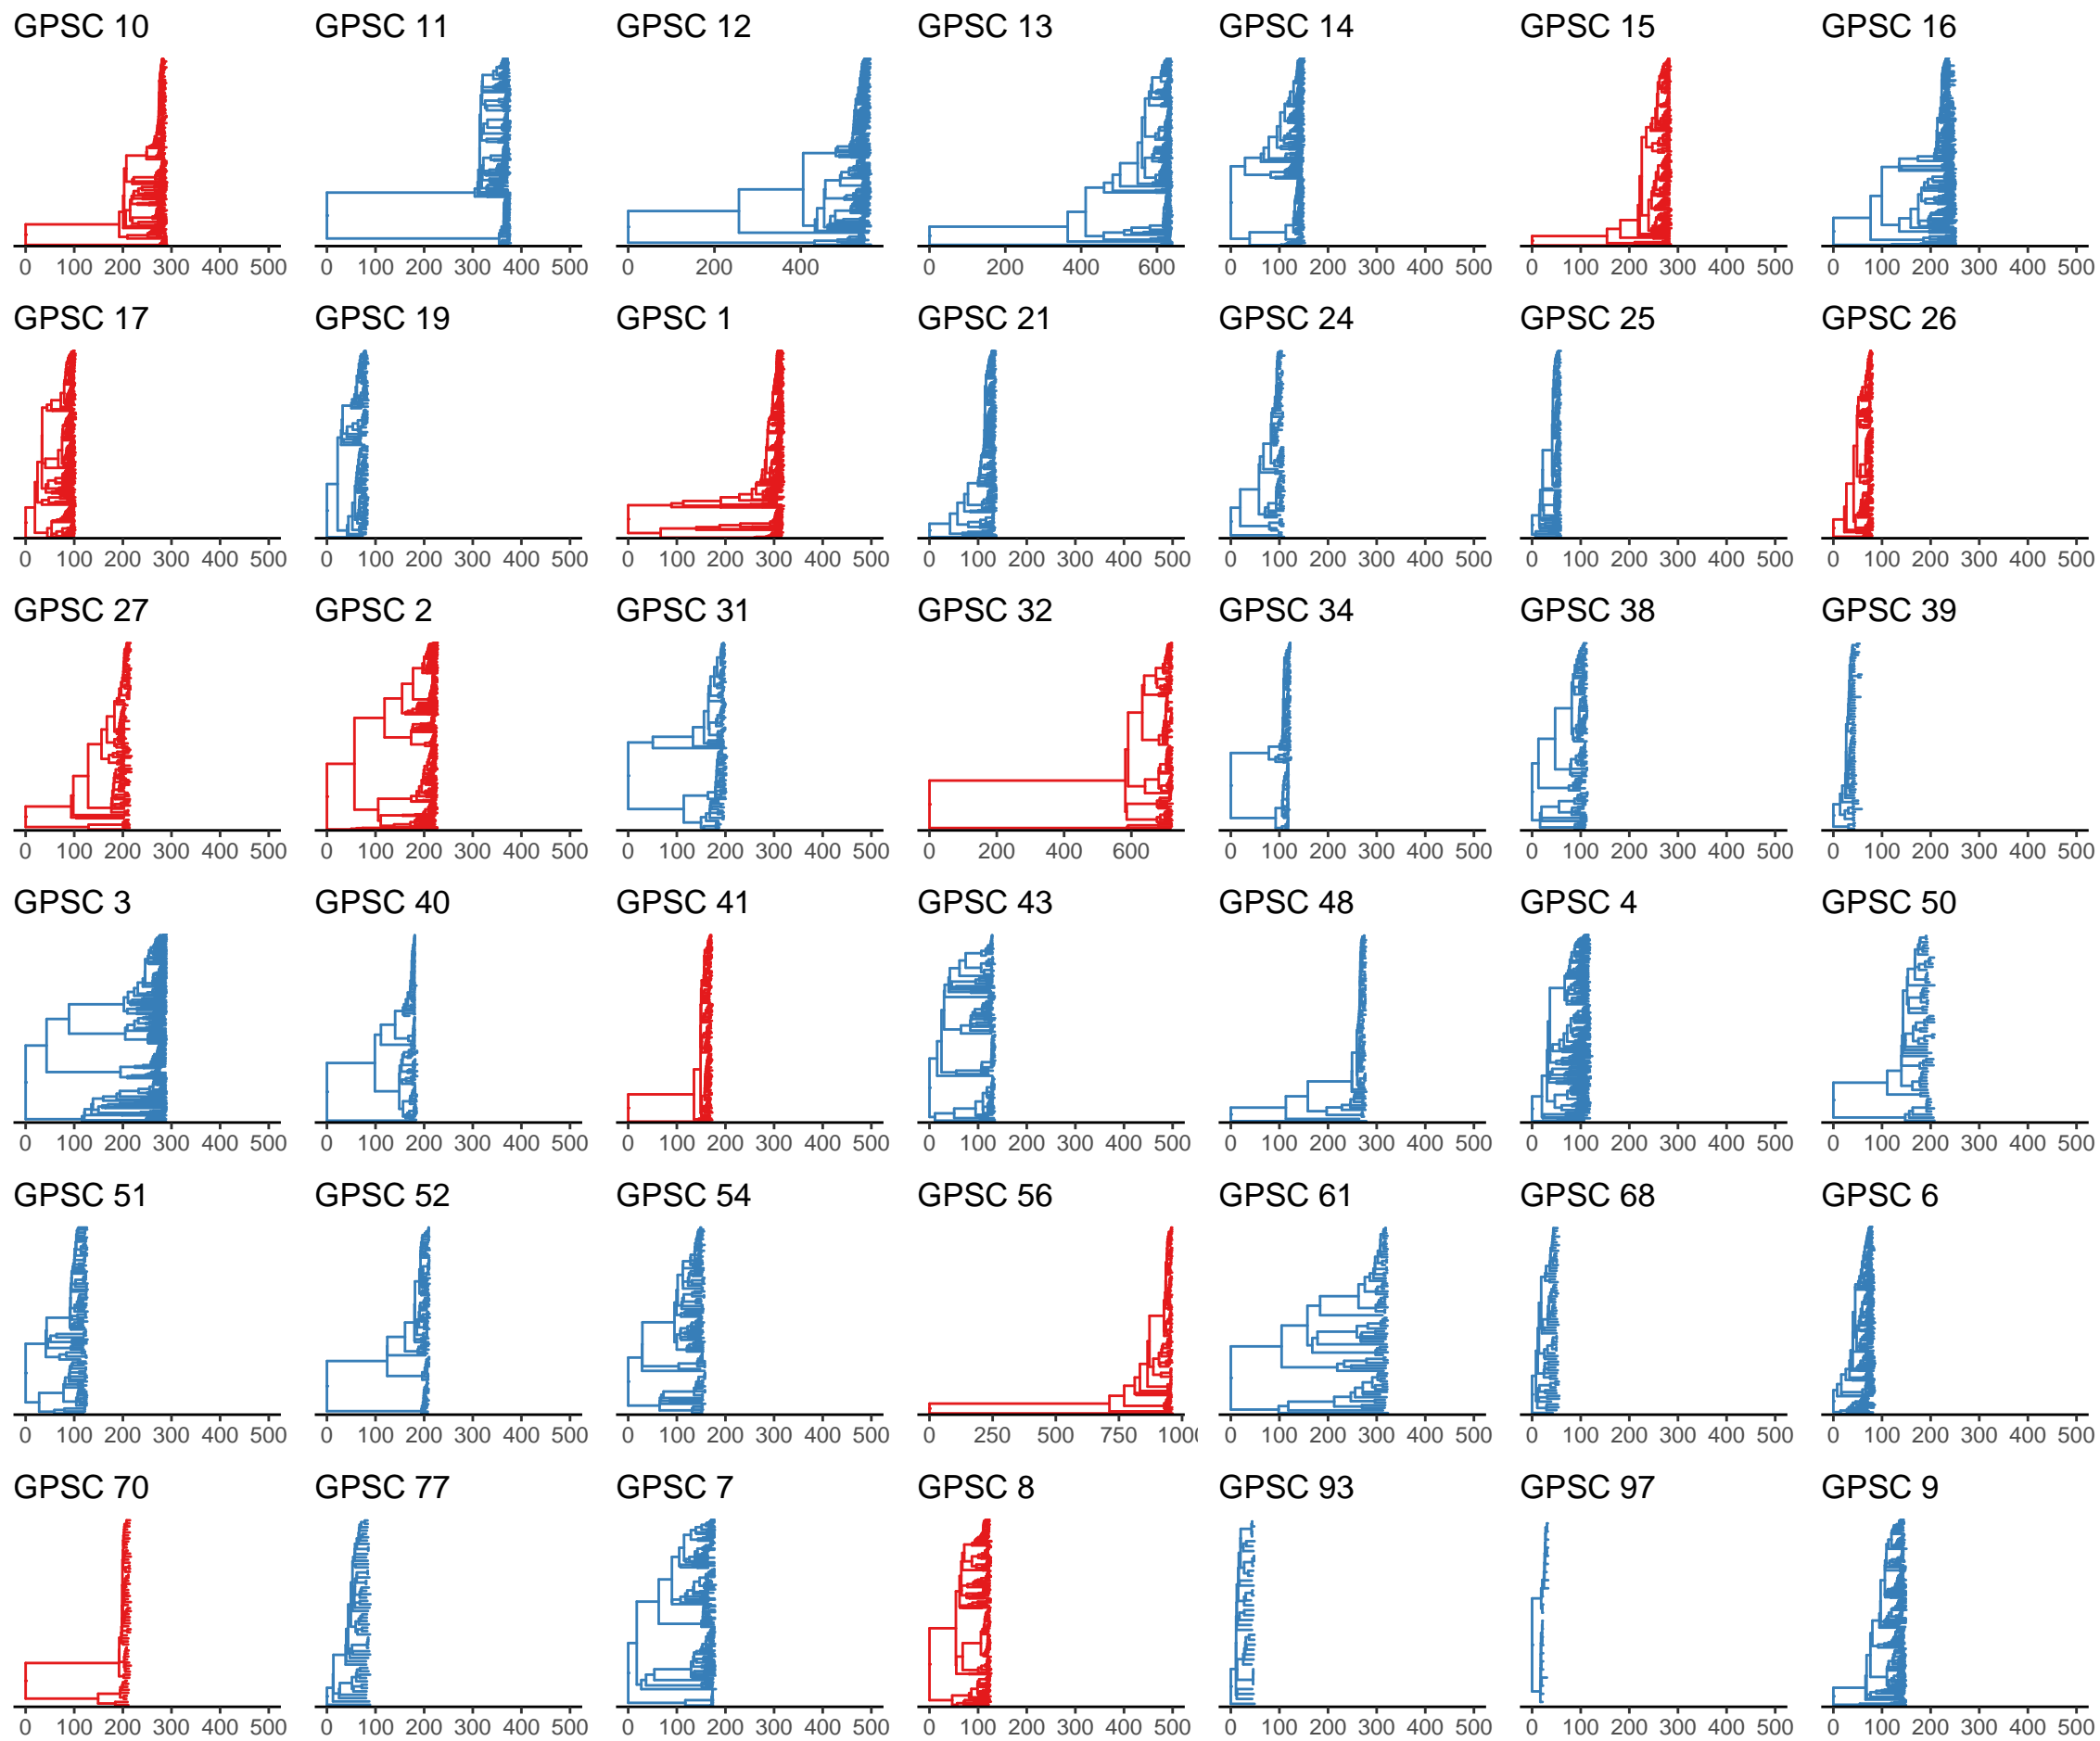

Supplement: Supplemental_Code_0.1.0.tar.gz.zip [file GPSC_phylogenies_sigOR.pdf › panstripe-manuscript-0.1.0/figures/GPSC_phylogenies_sigOR.pdf]

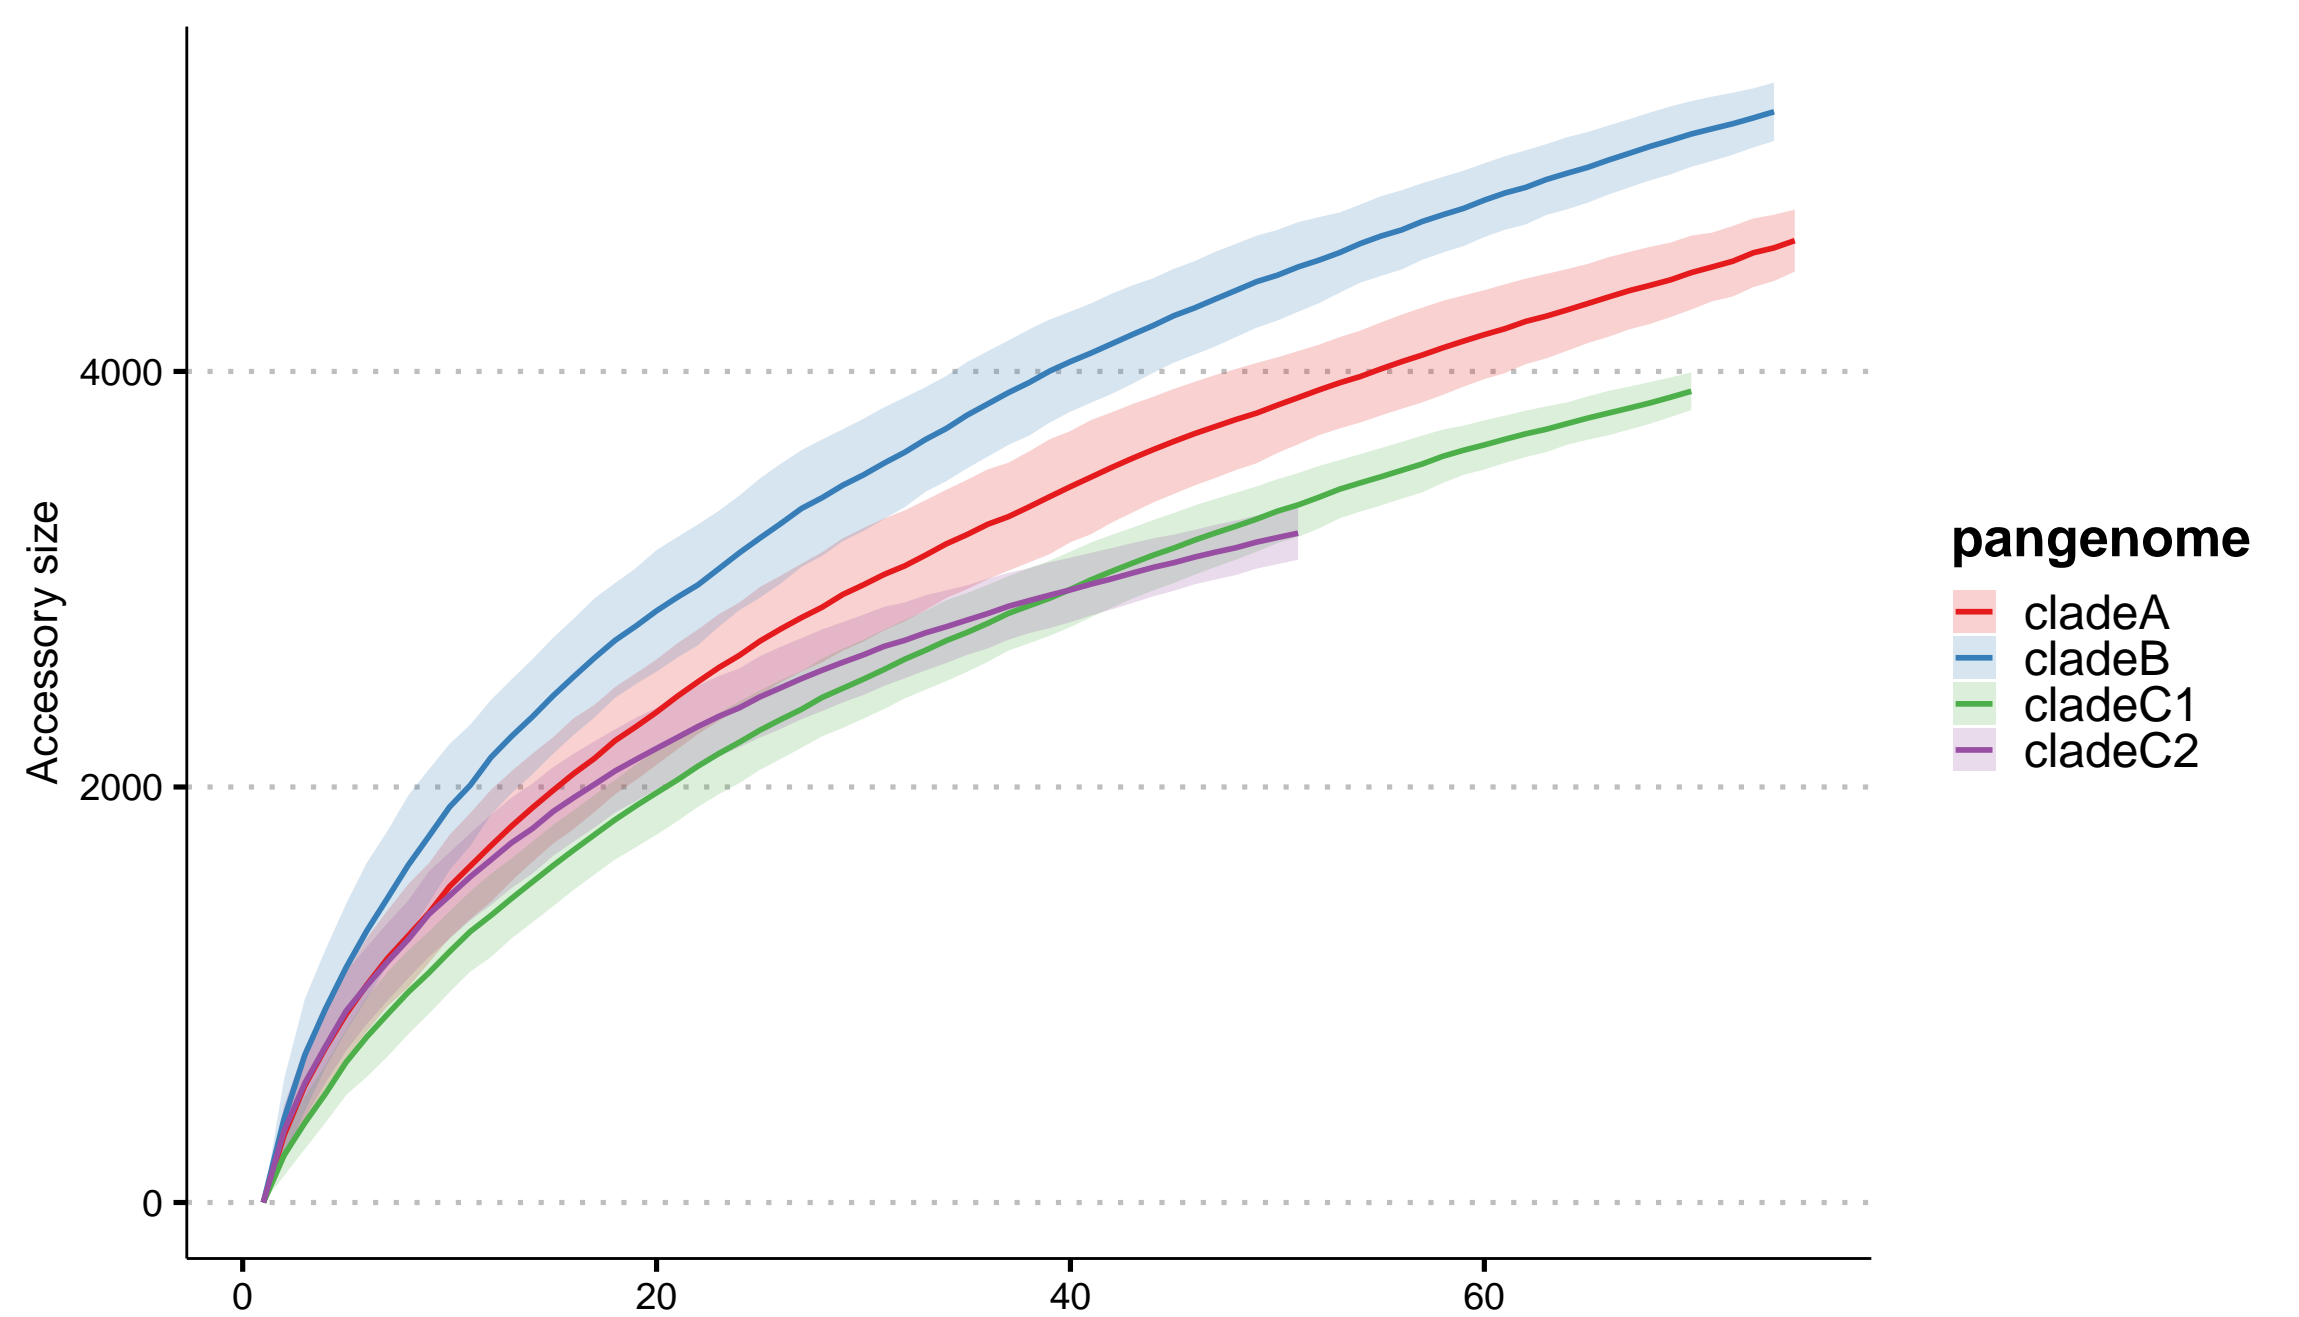

Supplement: Supplemental_Code_0.1.0.tar.gz.zip [file ecoli_accumulation_curves.pdf › panstripe-manuscript-0.1.0/figures/ecoli_accumulation_curves.pdf]

A.

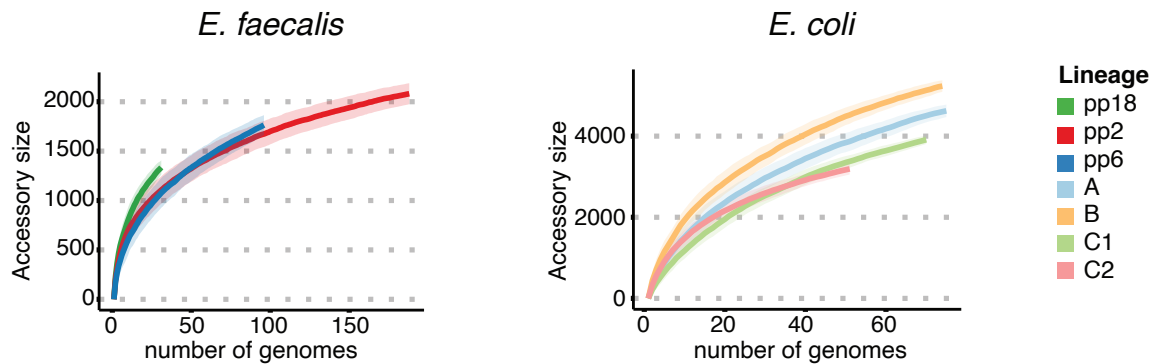

B.

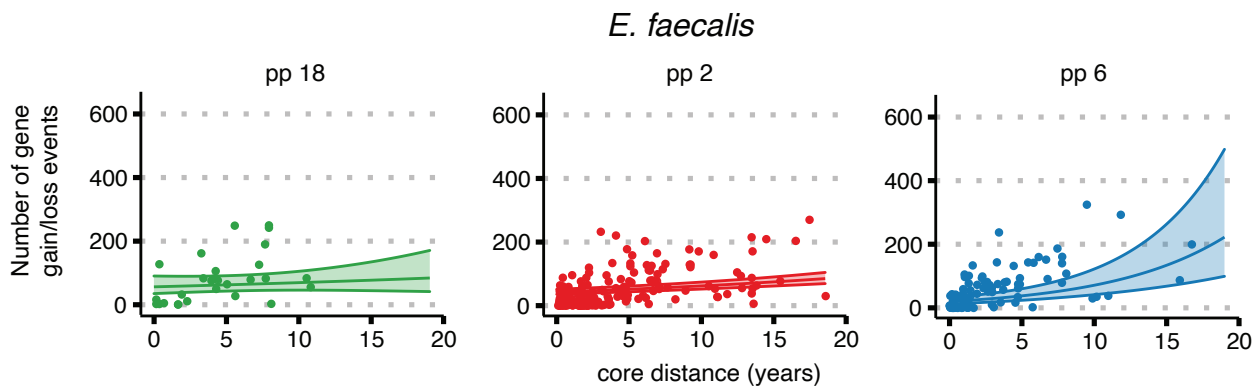

C.

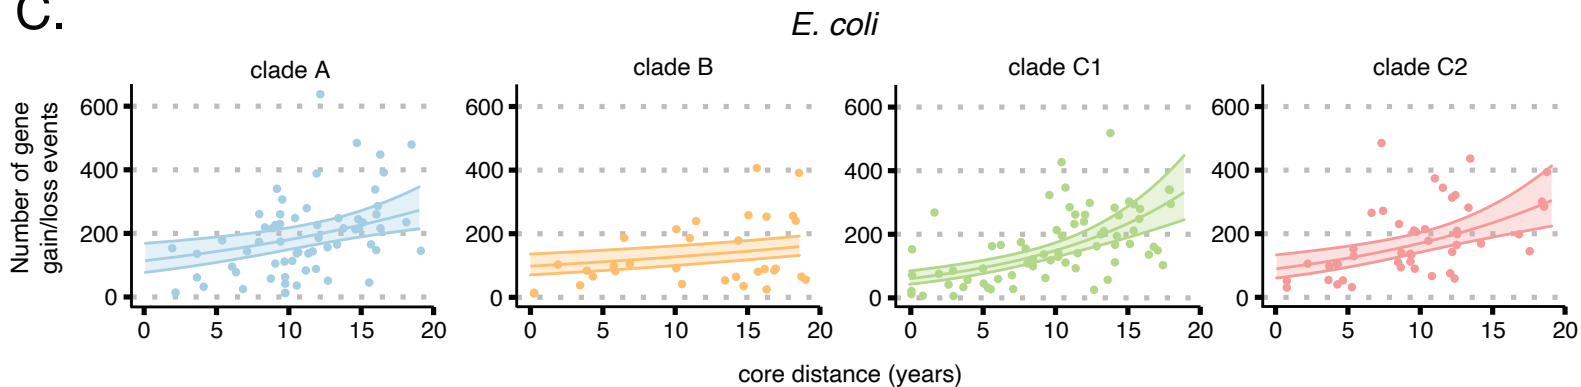

Supplement: Supplemental_Code_0.1.0.tar.gz.zip [file ecoli_efaecalis.pdf › panstripe-manuscript-0.1.0/figures/ecoli_efaecalis.pdf]

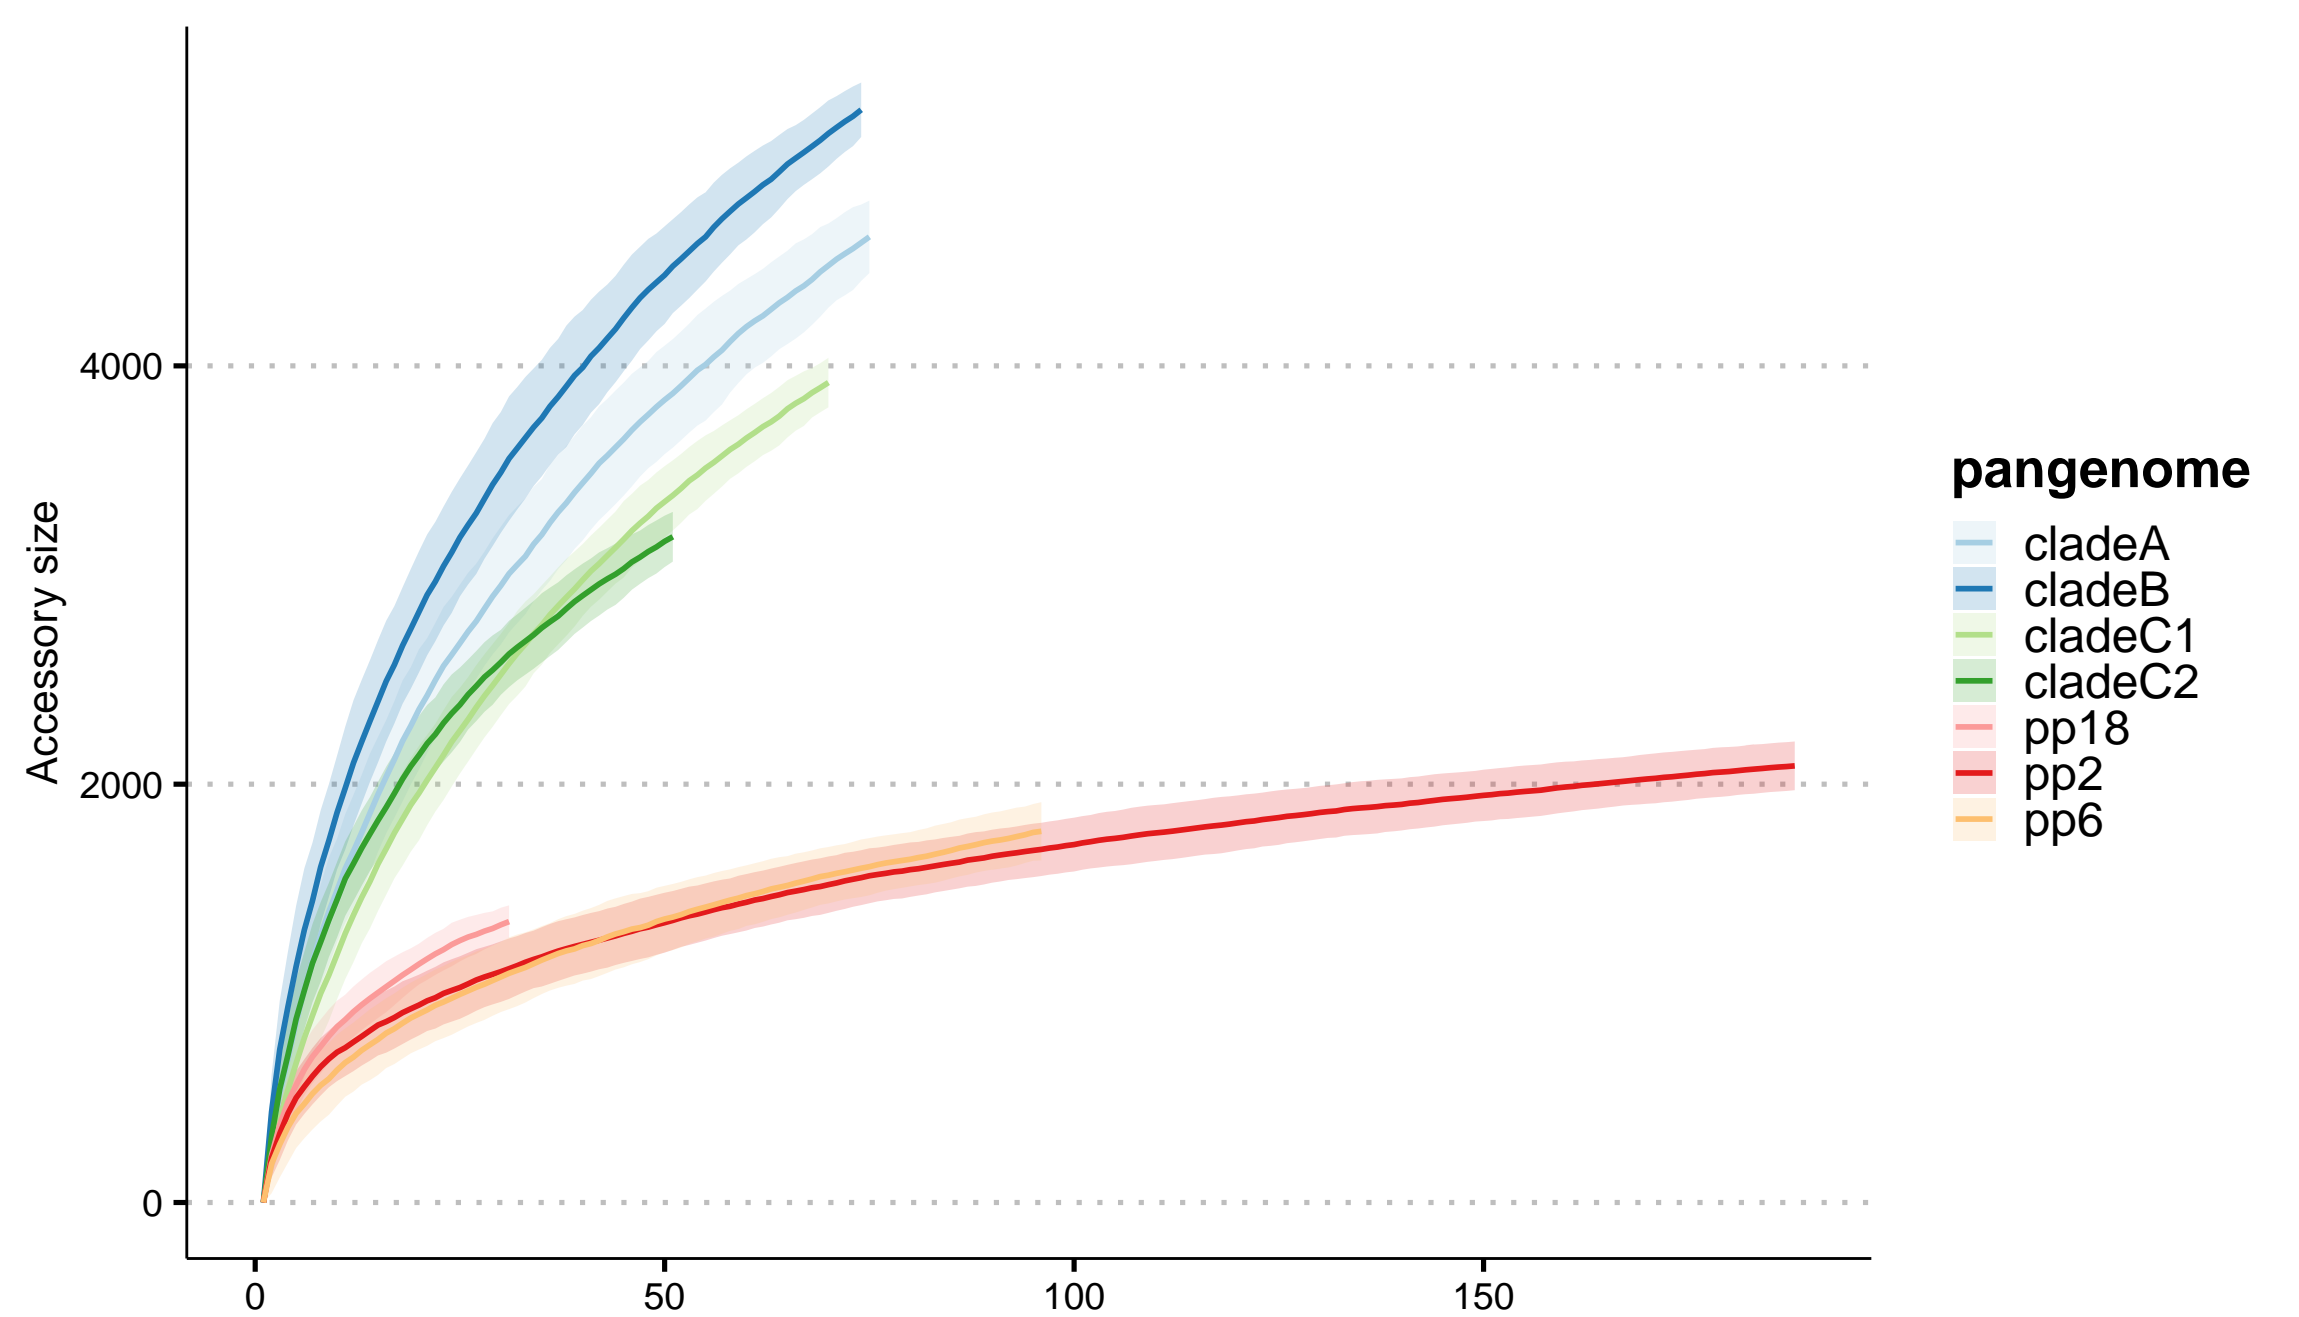

Supplement: Supplemental_Code_0.1.0.tar.gz.zip [file ecoli_efaecalis_accumulation_curves.pdf › panstripe-manuscript-0.1.0/figures/ecoli_efaecalis_accumulation_curves.pdf]

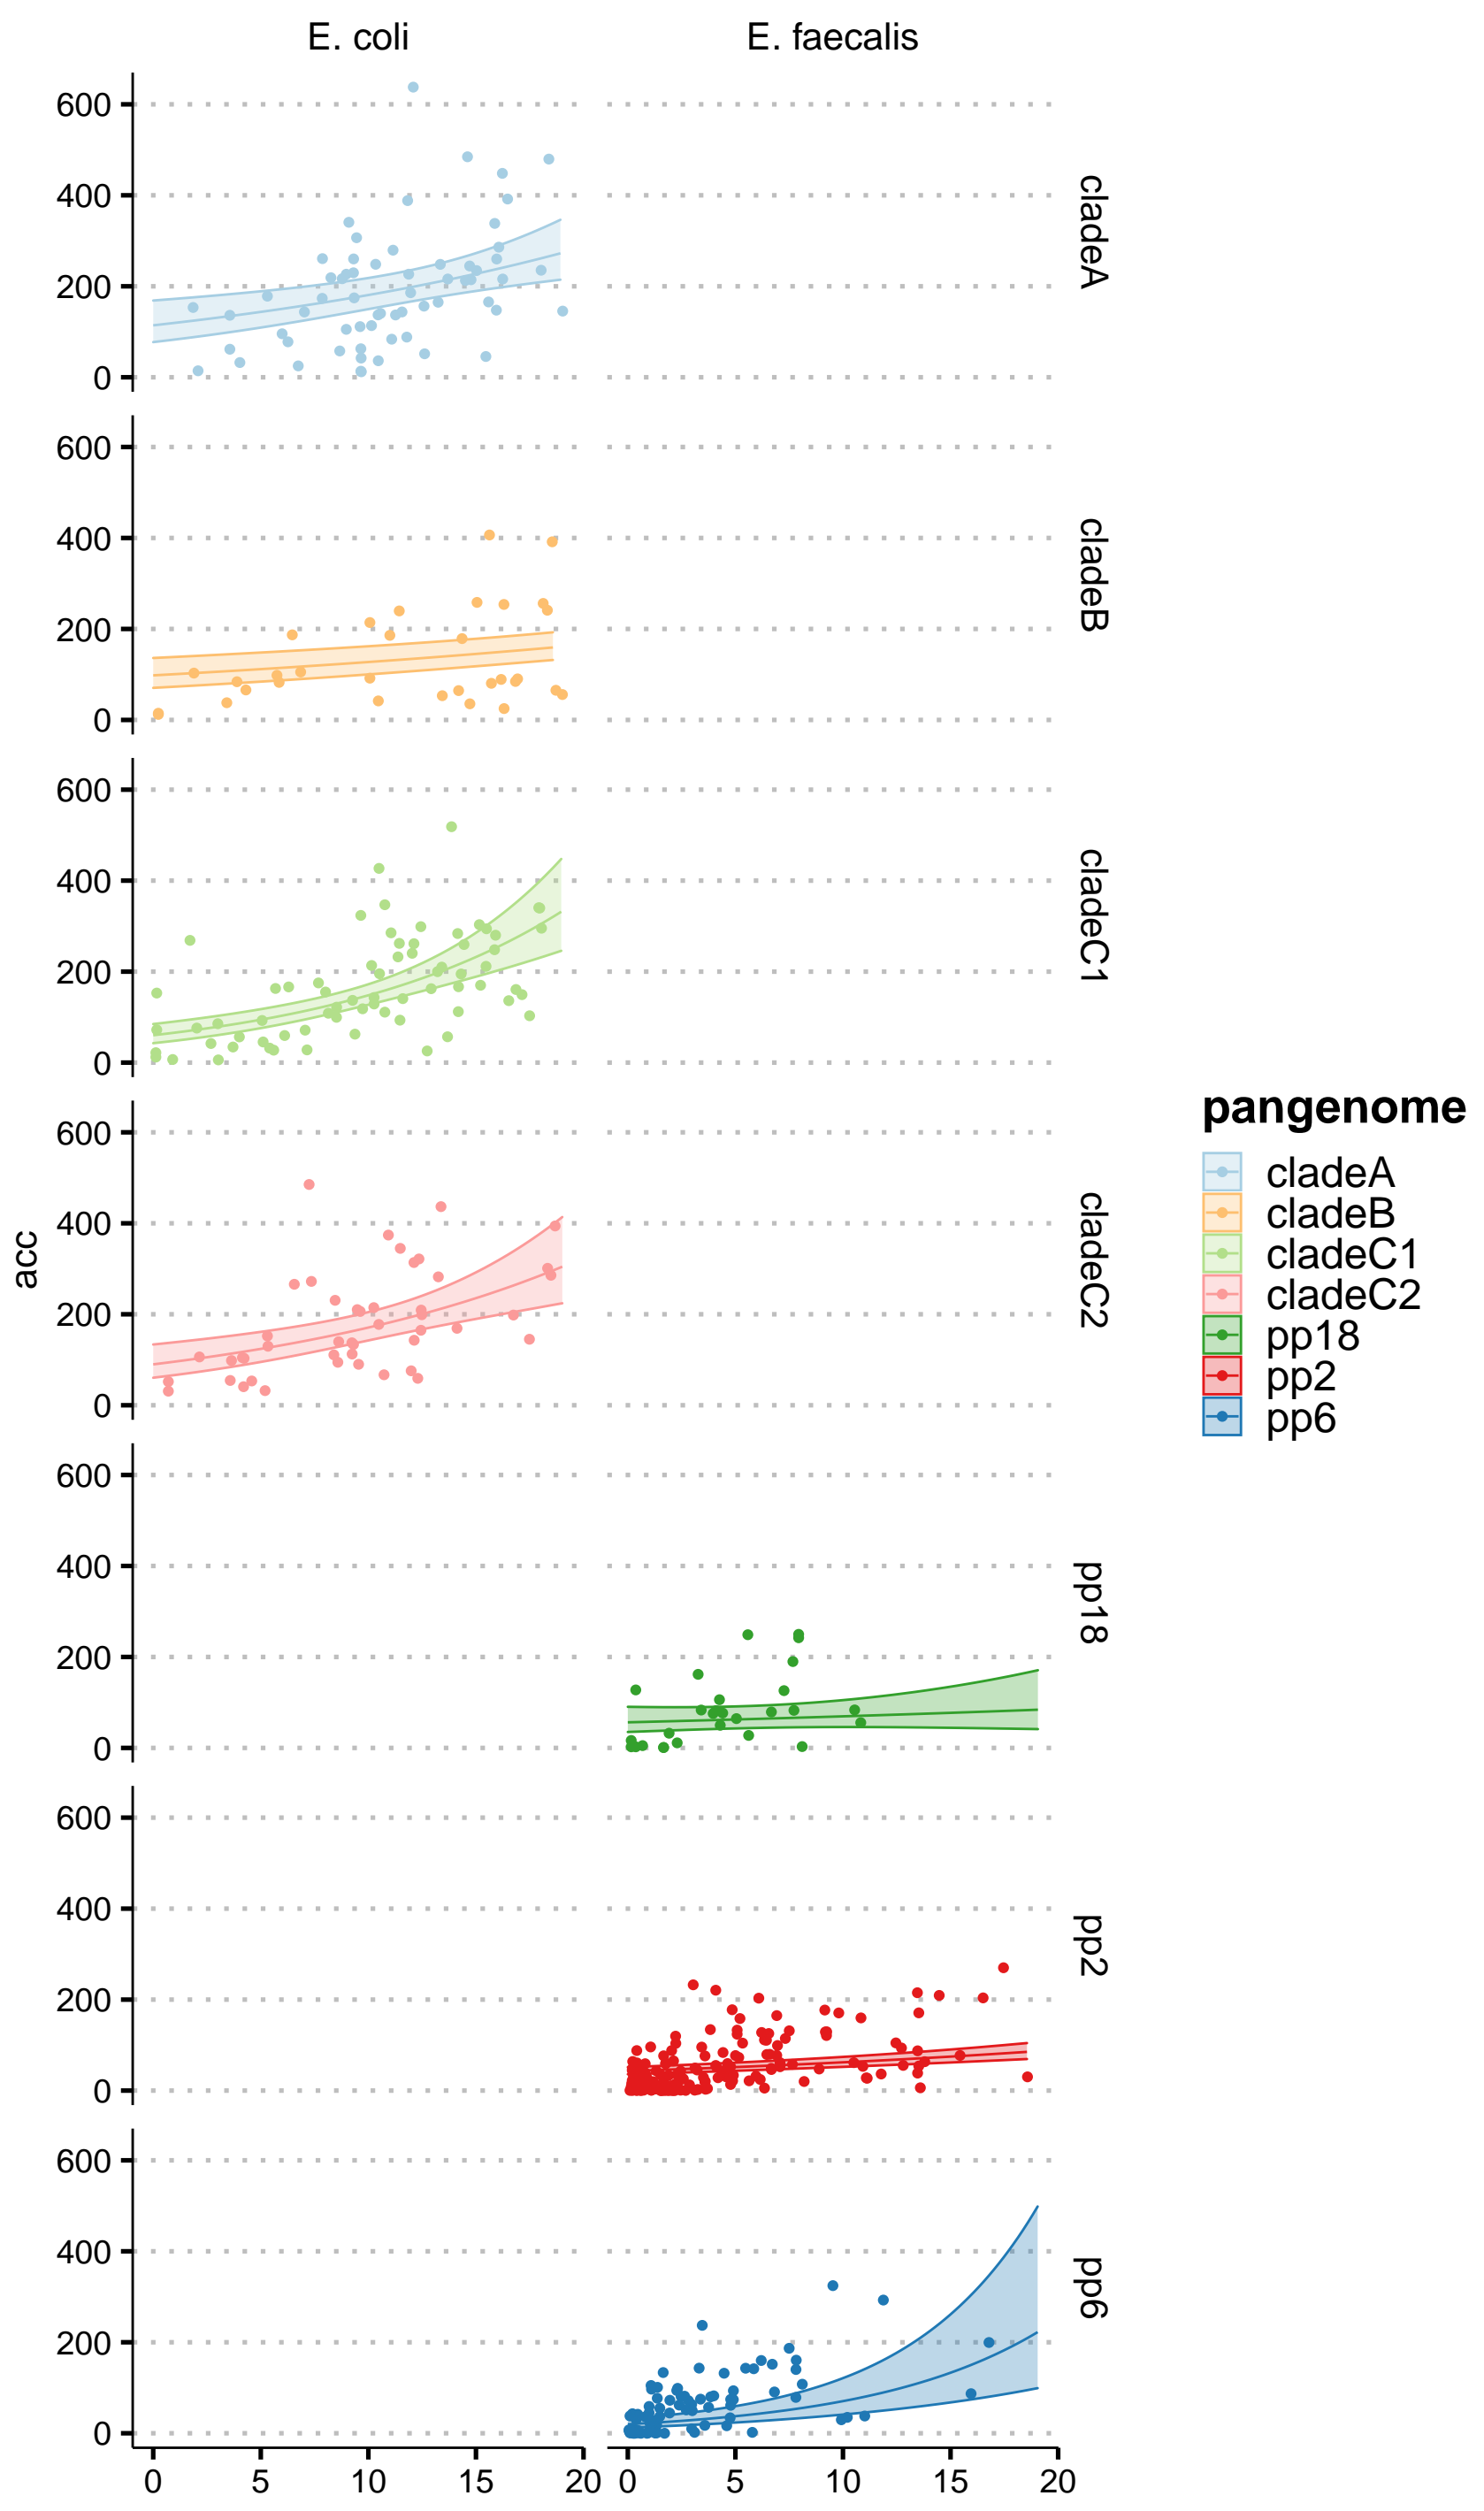

Supplement: Supplemental_Code_0.1.0.tar.gz.zip [file ecoli_efaecalis_pangenome_fits.pdf › panstripe-manuscript-0.1.0/figures/ecoli_efaecalis_pangenome_fits.pdf]

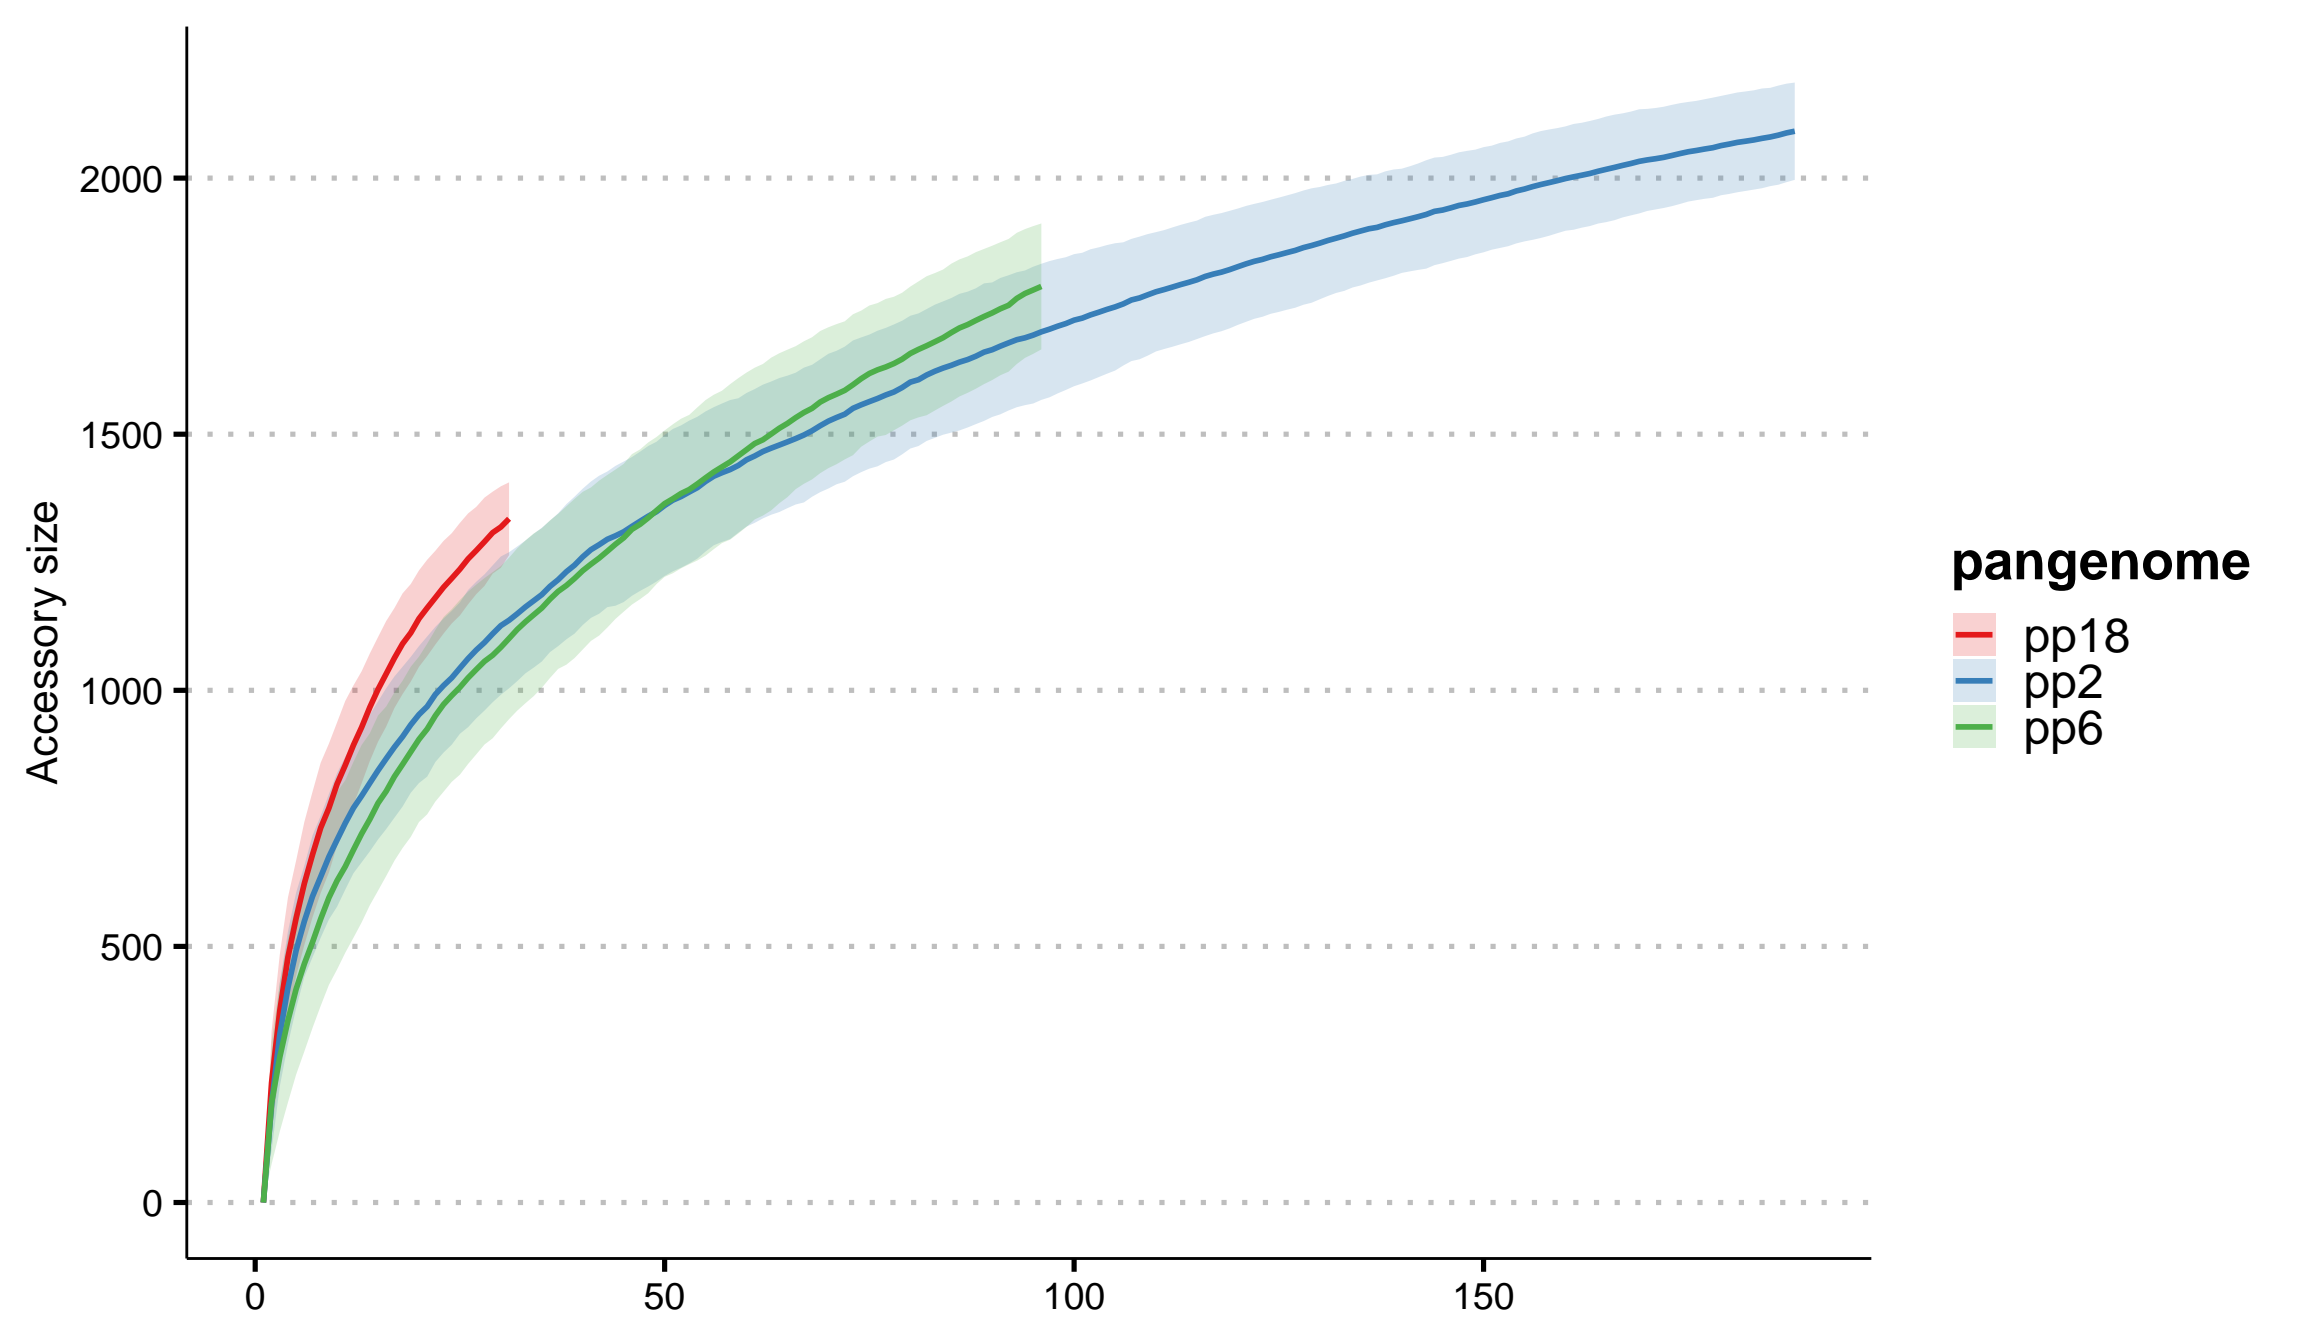

Supplement: Supplemental_Code_0.1.0.tar.gz.zip [file efaecalis_pangenome_accumulation_curves.pdf › panstripe-manuscript-0.1.0/figures/efaecalis_pangenome_accumulation_curves.pdf]

pp18

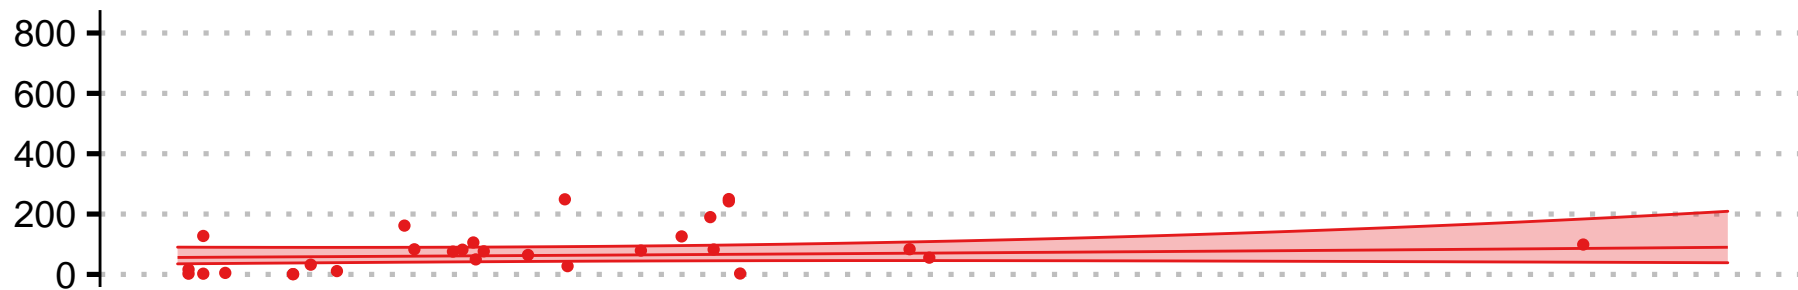

pp2

accessory distance

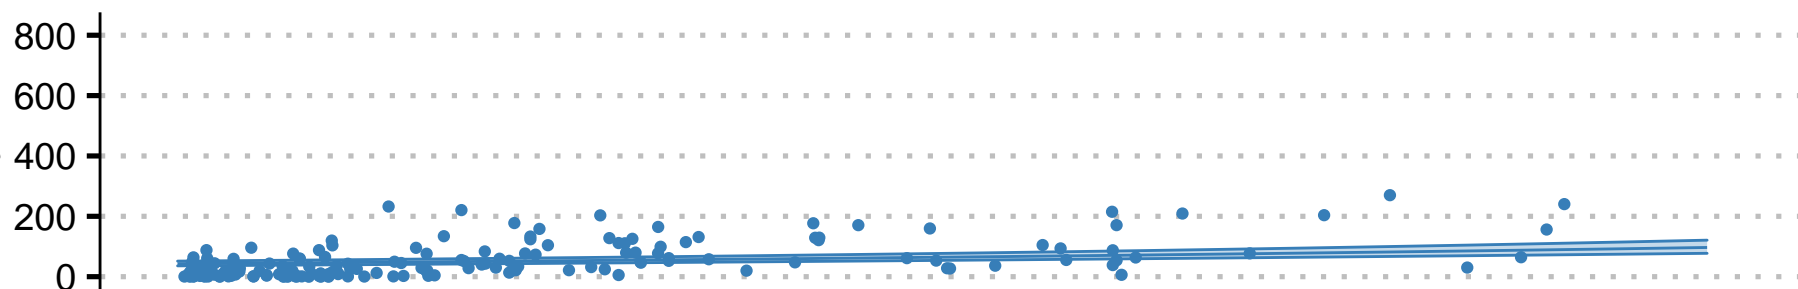**pangenome**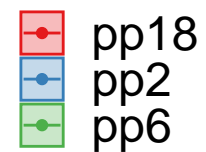

pp6

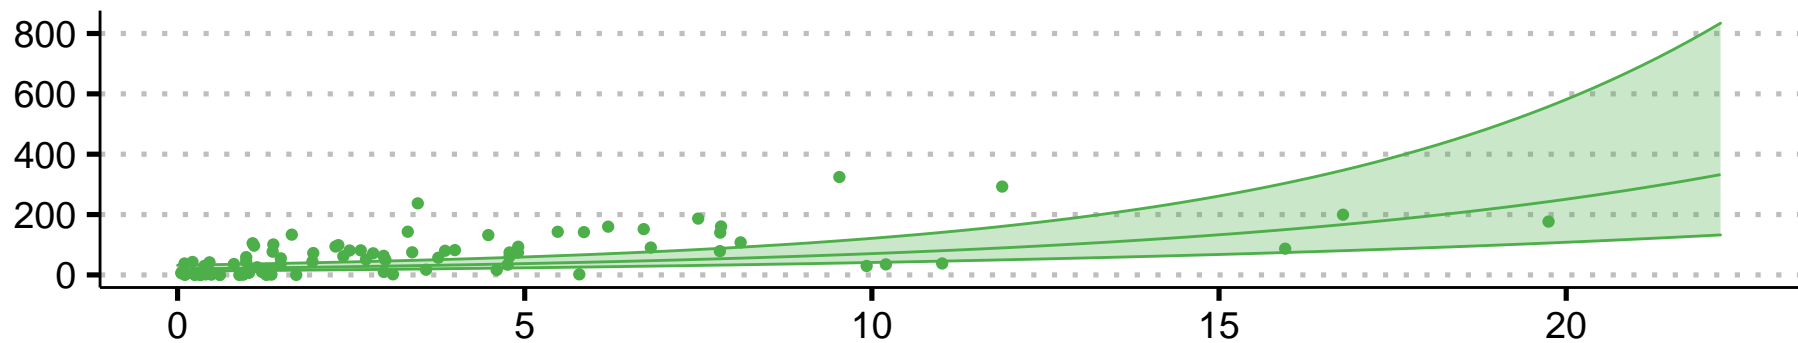

Supplement: Supplemental_Code_0.1.0.tar.gz.zip [file efaecalis_pangenome_fits.pdf › panstripe-manuscript-0.1.0/figures/efaecalis_pangenome_fits.pdf]

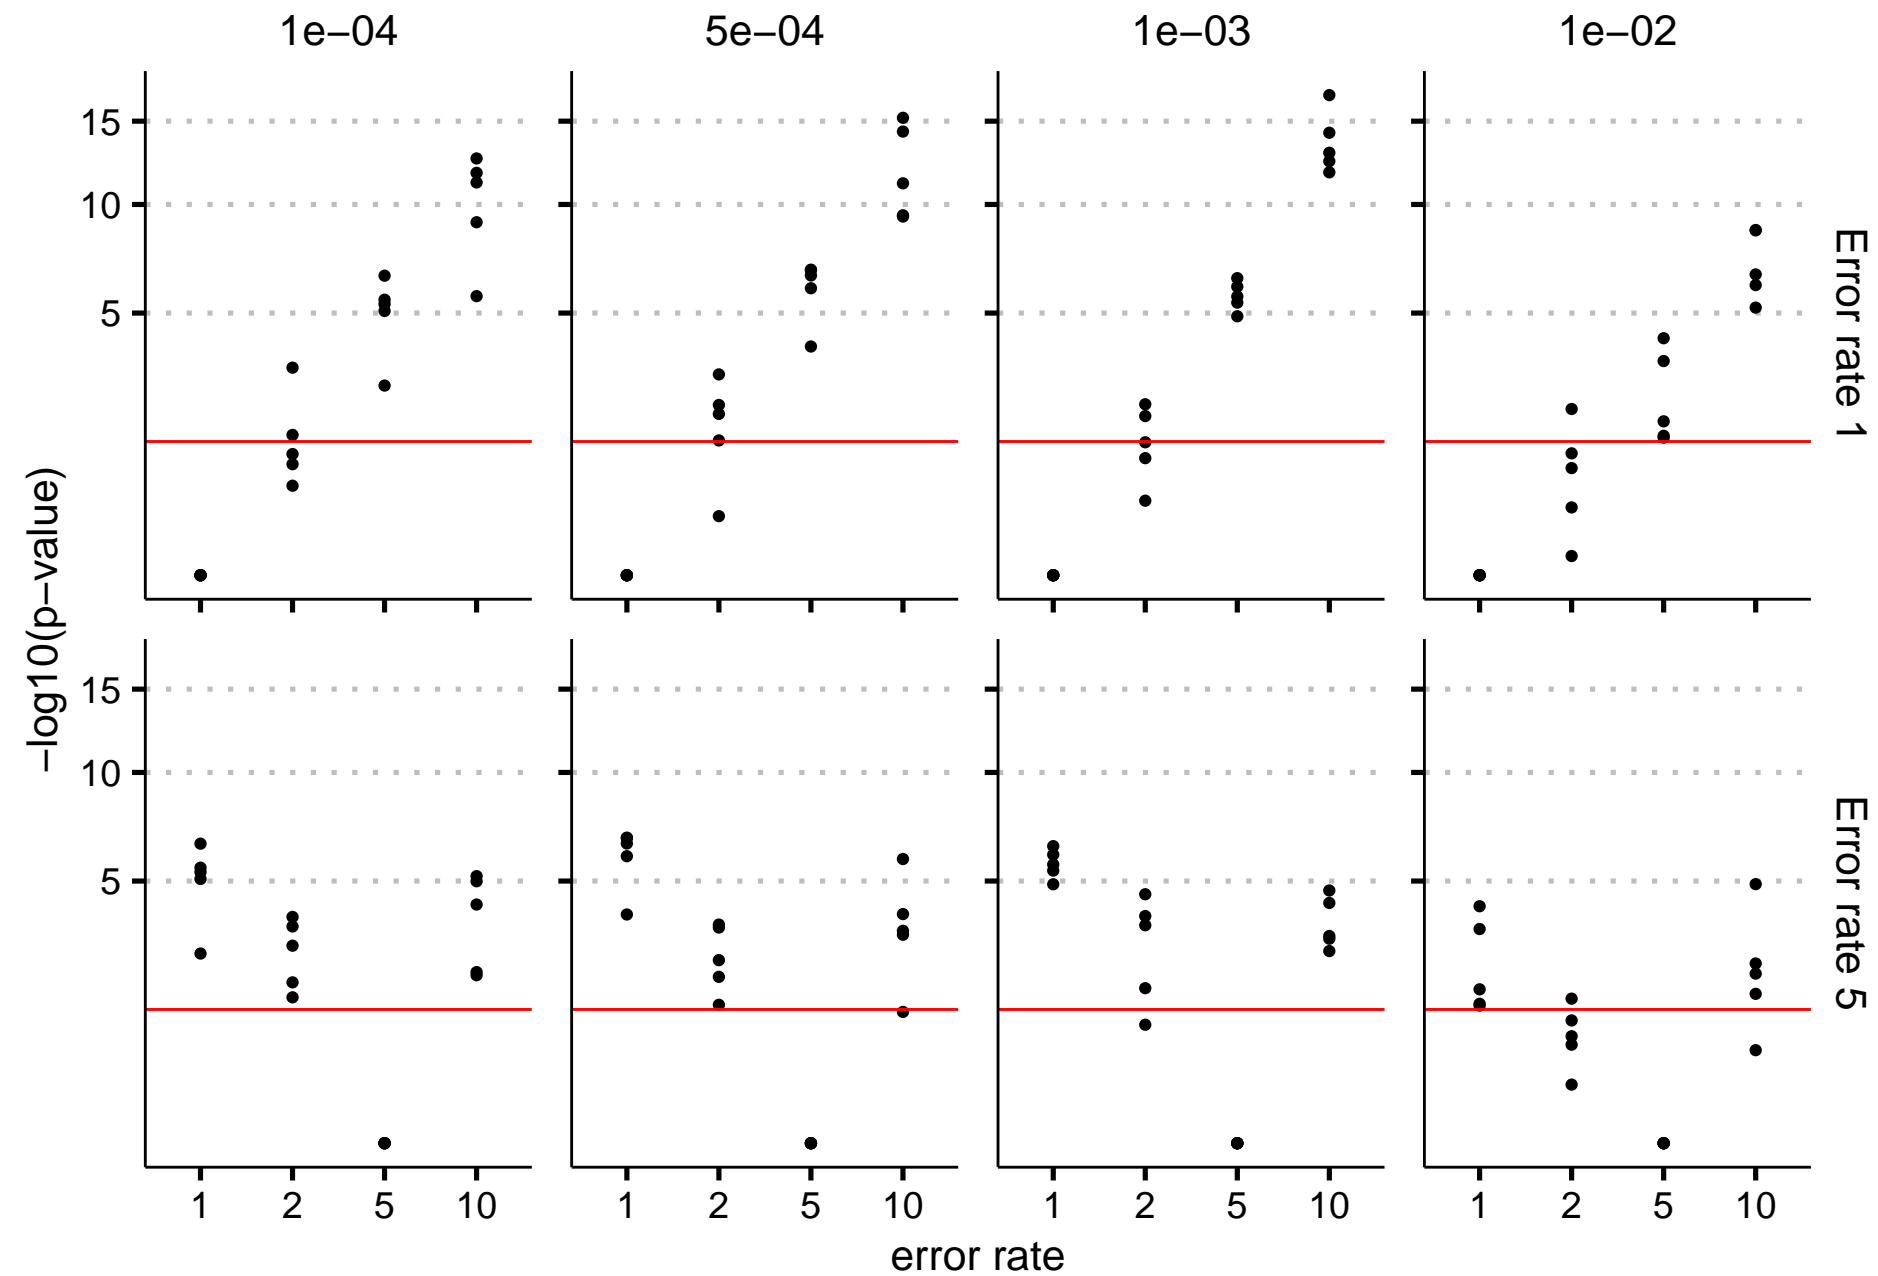

Supplement: Supplemental_Code_0.1.0.tar.gz.zip [file error_rate_comparison.pdf › panstripe-manuscript-0.1.0/figures/error_rate_comparison.pdf]

**A.**

Accumulation curve

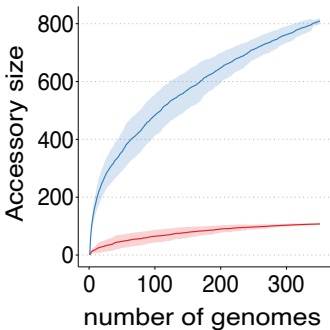**B.**

Panstripe

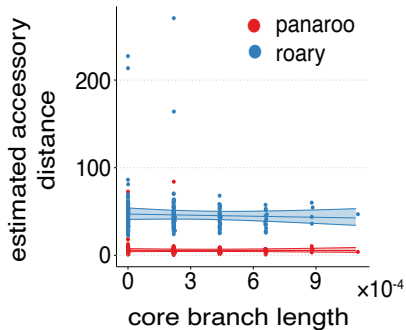

Supplement: Supplemental_Code_0.1.0.tar.gz.zip [file fig2.pdf › panstripe-manuscript-0.1.0/figures/fig2.pdf]

**A.**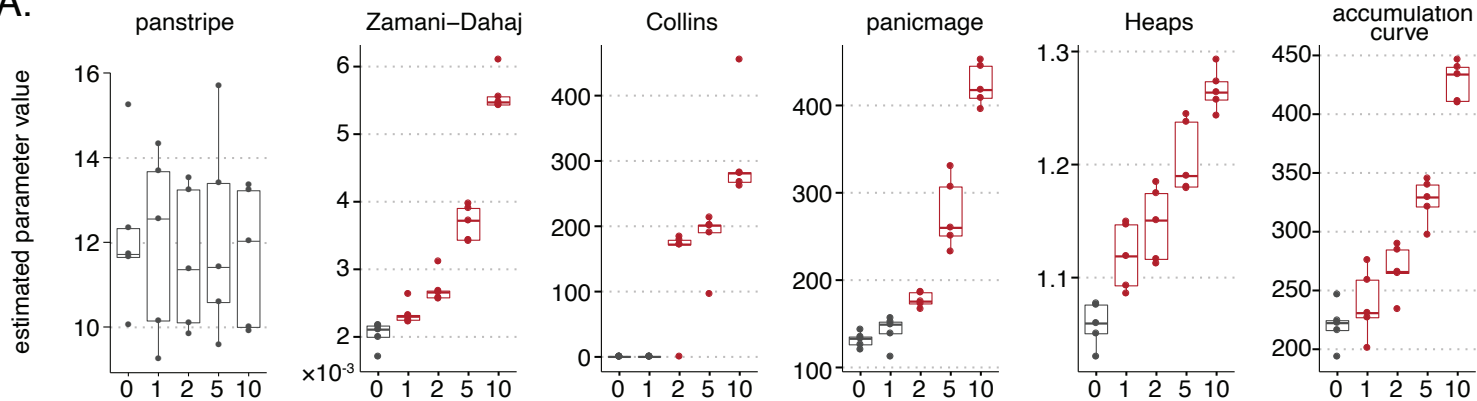**B.**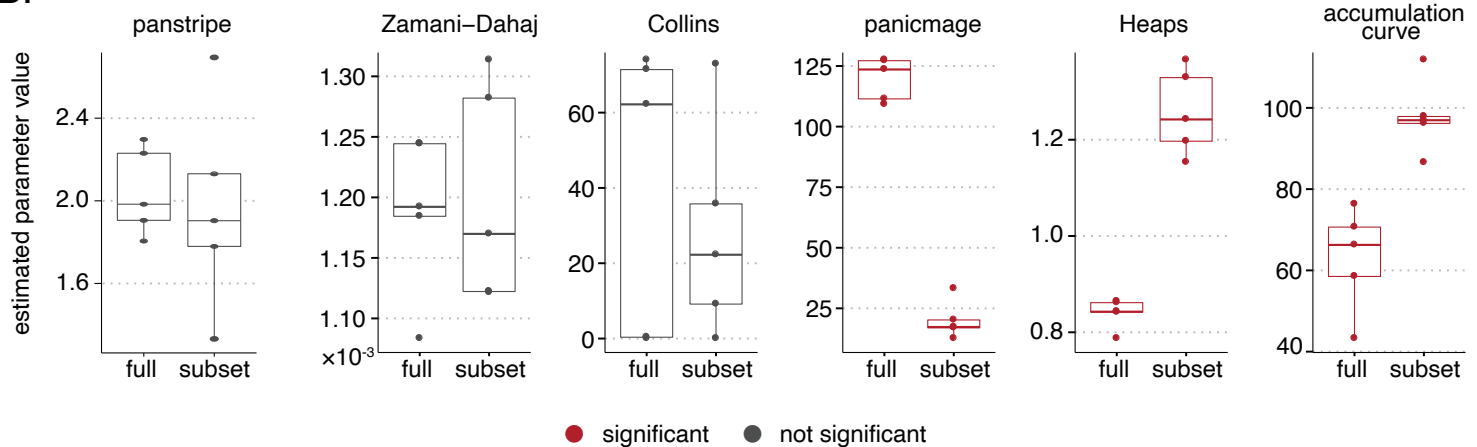

Supplement: Supplemental_Code_0.1.0.tar.gz.zip [file fig3.pdf › panstripe-manuscript-0.1.0/figures/fig3.pdf]

A.

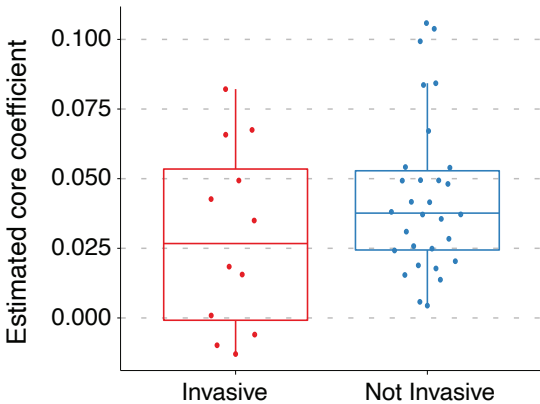

B.

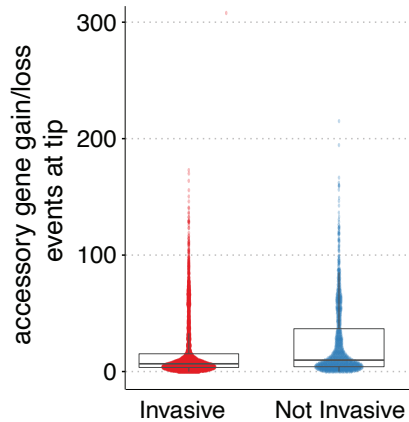

C.

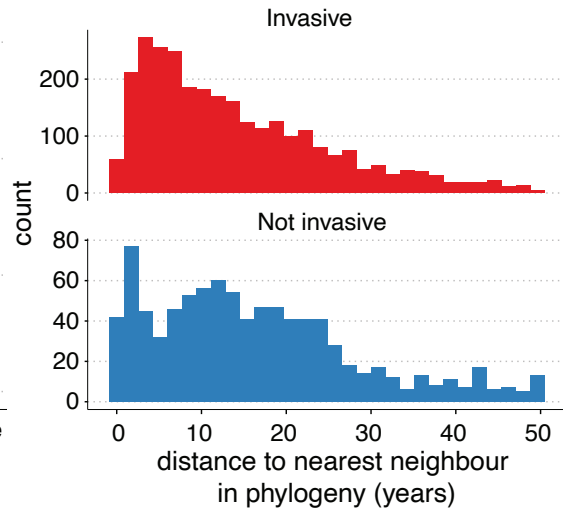

Supplement: Supplemental_Code_0.1.0.tar.gz.zip [file fig4.pdf › panstripe-manuscript-0.1.0/figures/fig4.pdf]

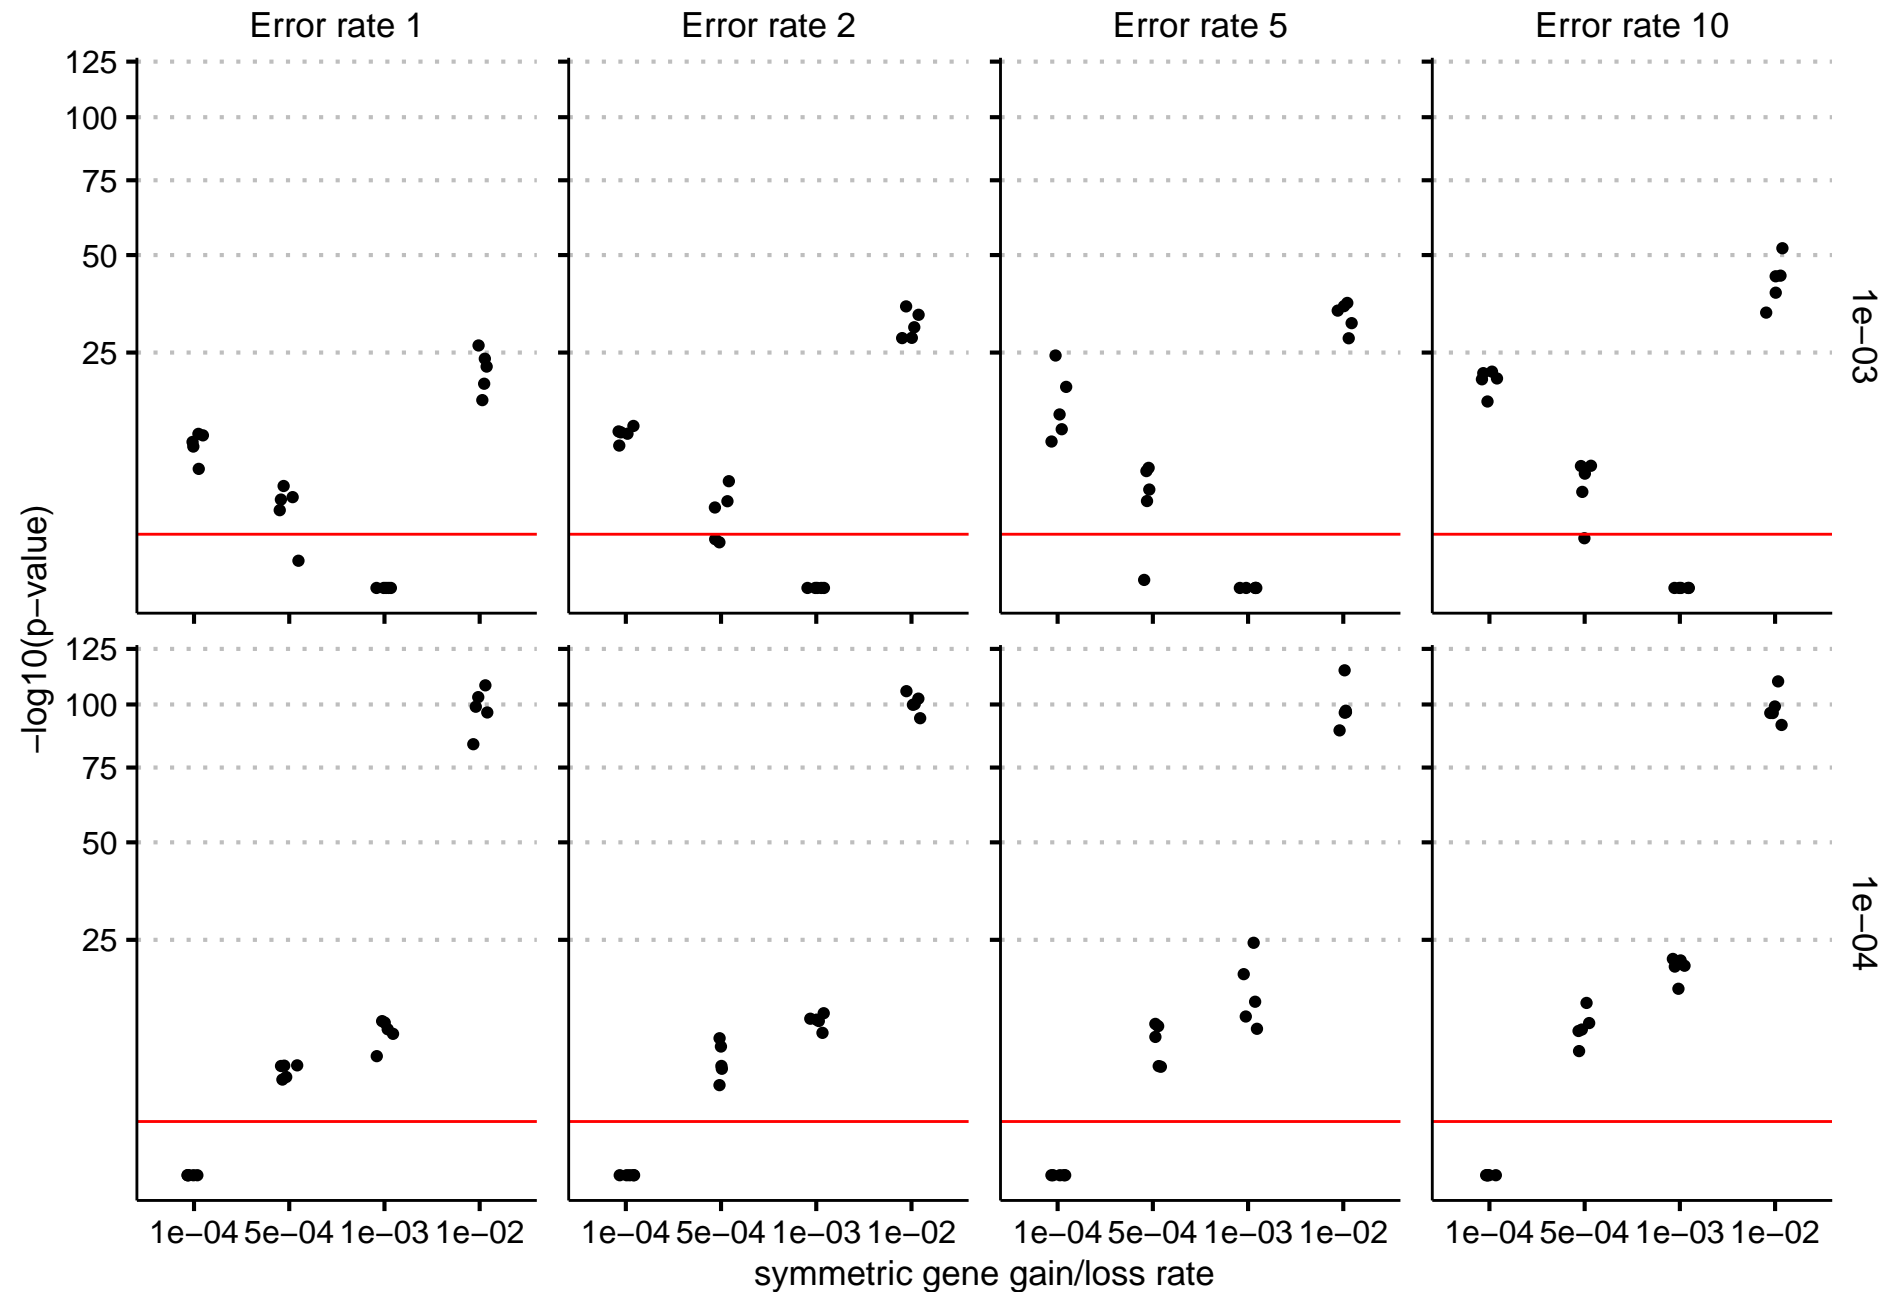

Supplement: Supplemental_Code_0.1.0.tar.gz.zip [file gl_rate_comparison.pdf › panstripe-manuscript-0.1.0/figures/gl_rate_comparison.pdf]

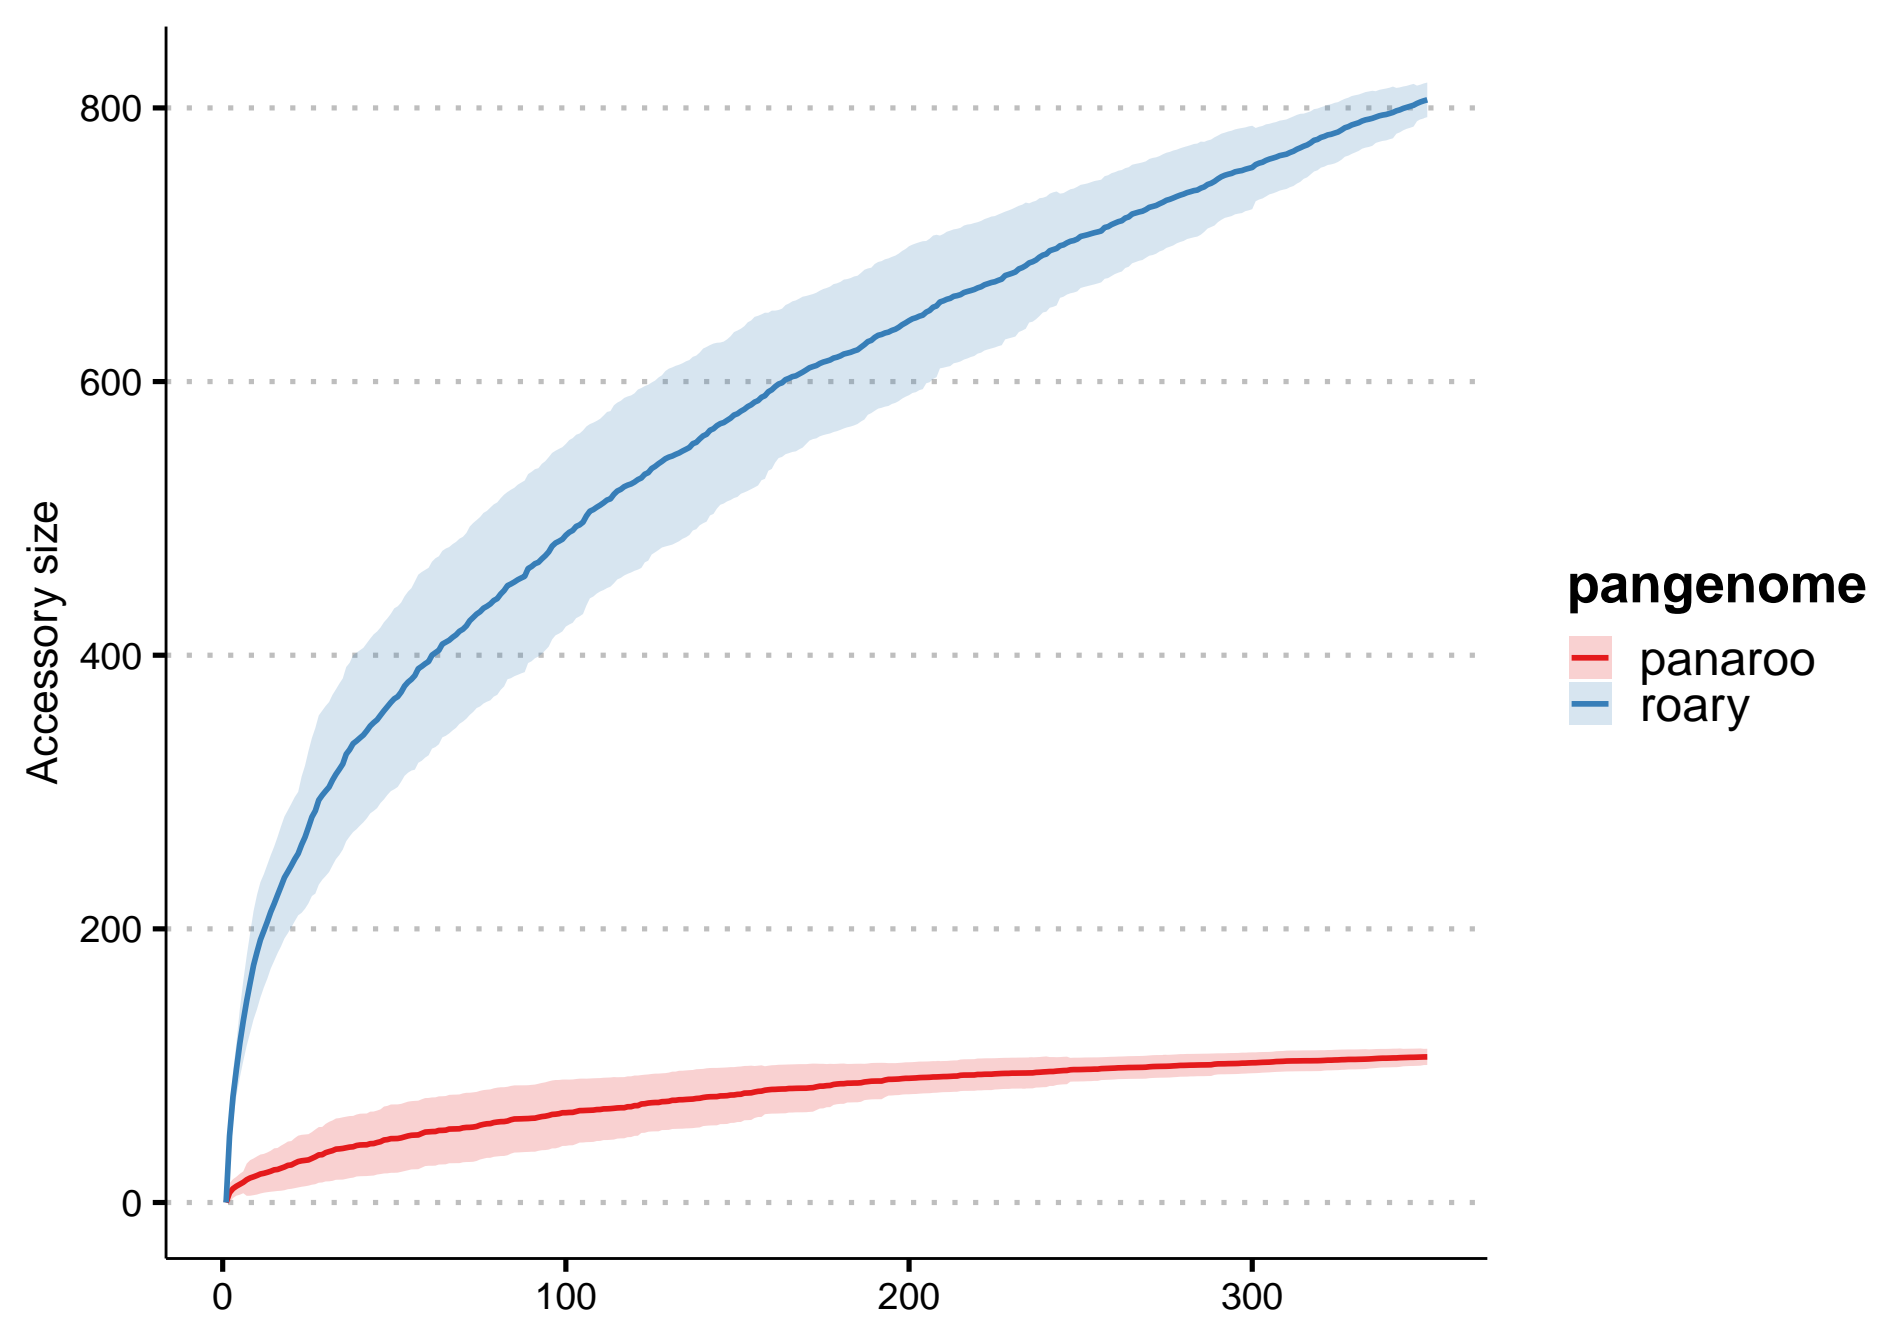

Supplement: Supplemental_Code_0.1.0.tar.gz.zip [file mtb_accumulation_curve_panaroo_roary.pdf › panstripe-manuscript-0.1.0/figures/mtb_accumulation_curve_panaroo_roary.pdf]

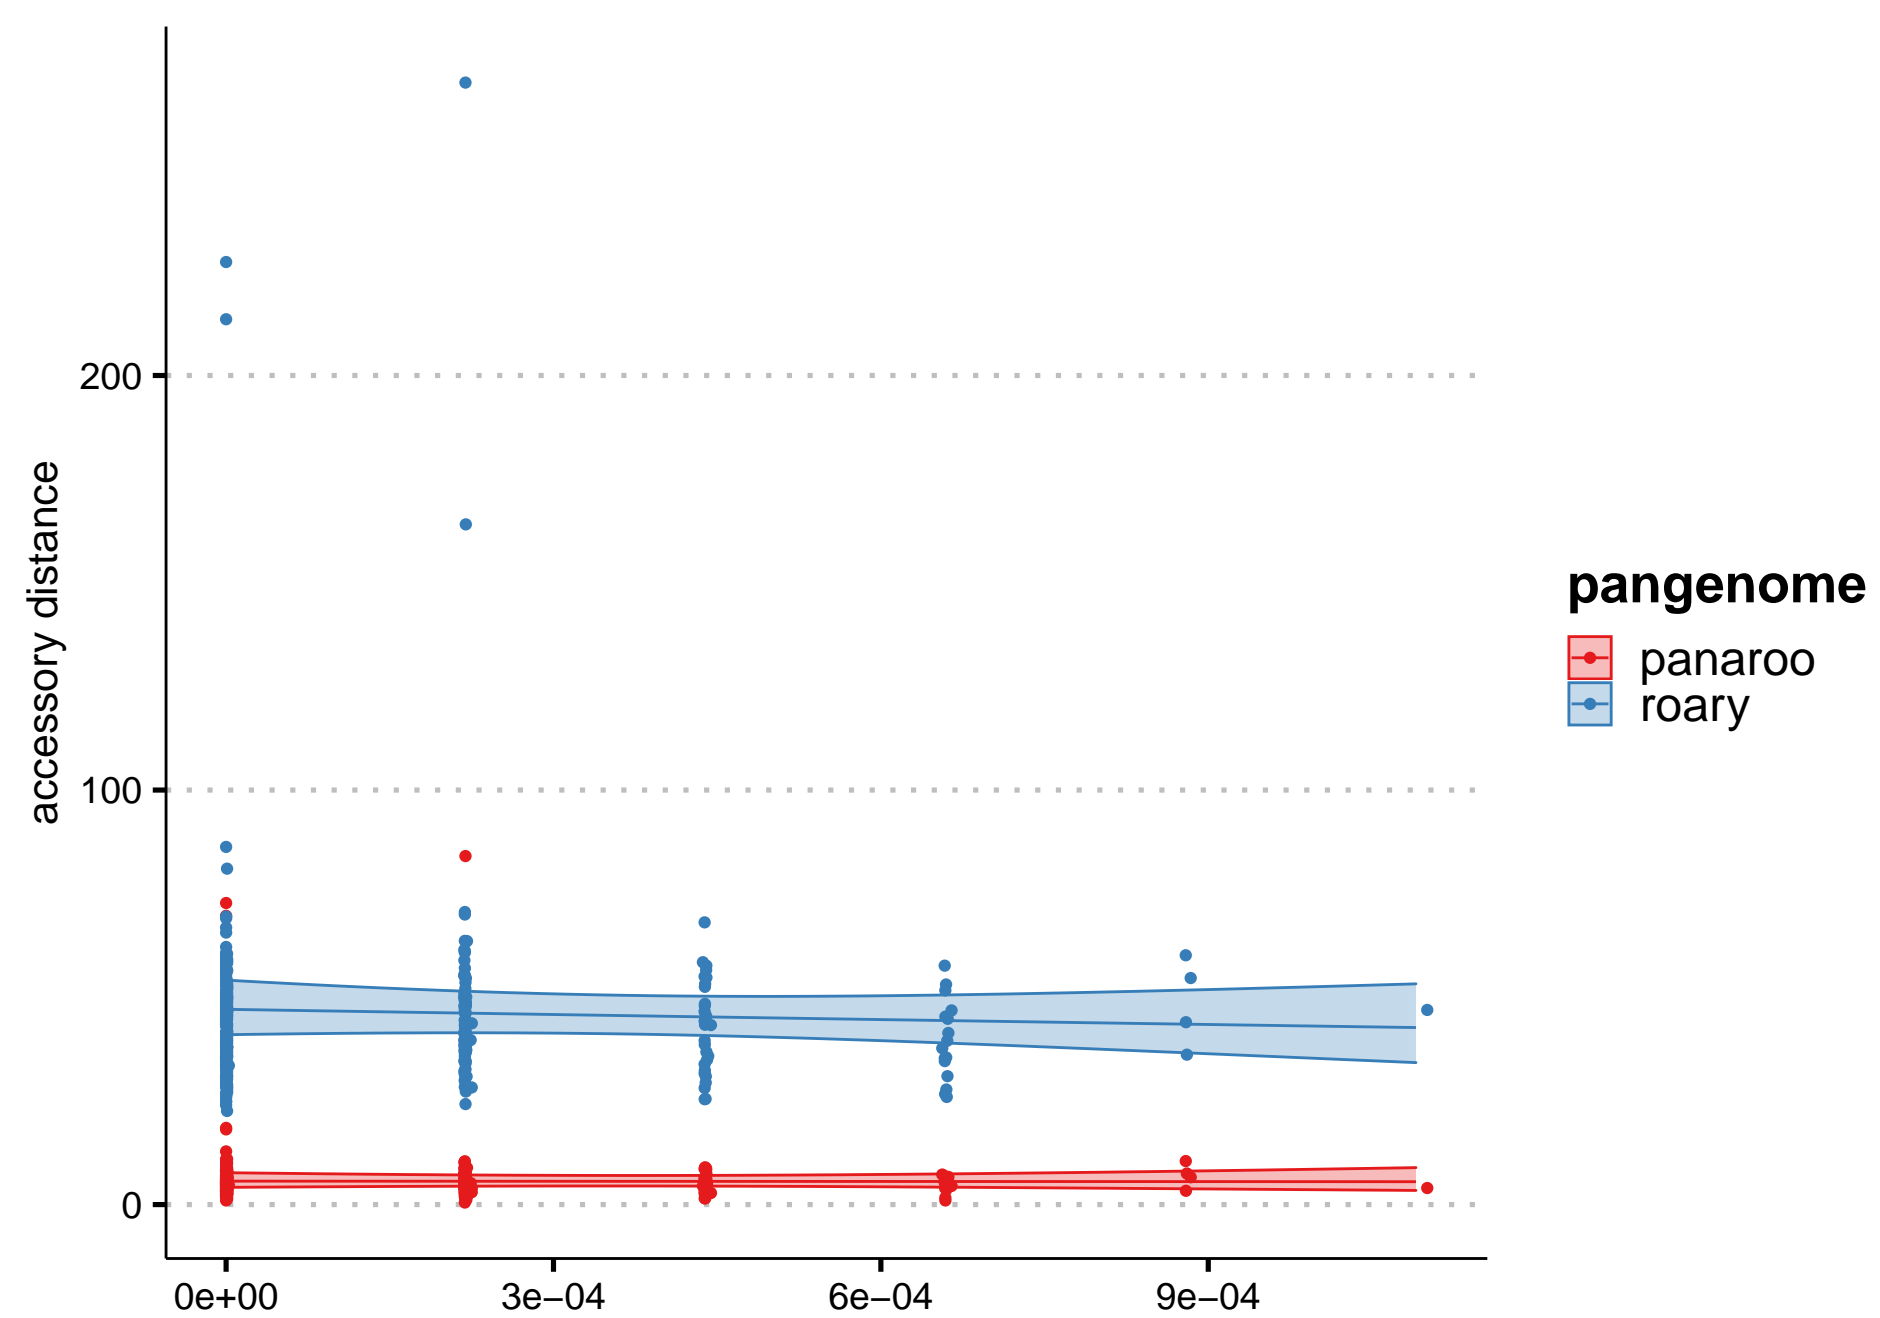

Supplement: Supplemental_Code_0.1.0.tar.gz.zip [file mtb_panstripe_panaroo_roary.pdf › panstripe-manuscript-0.1.0/figures/mtb_panstripe_panaroo_roary.pdf]

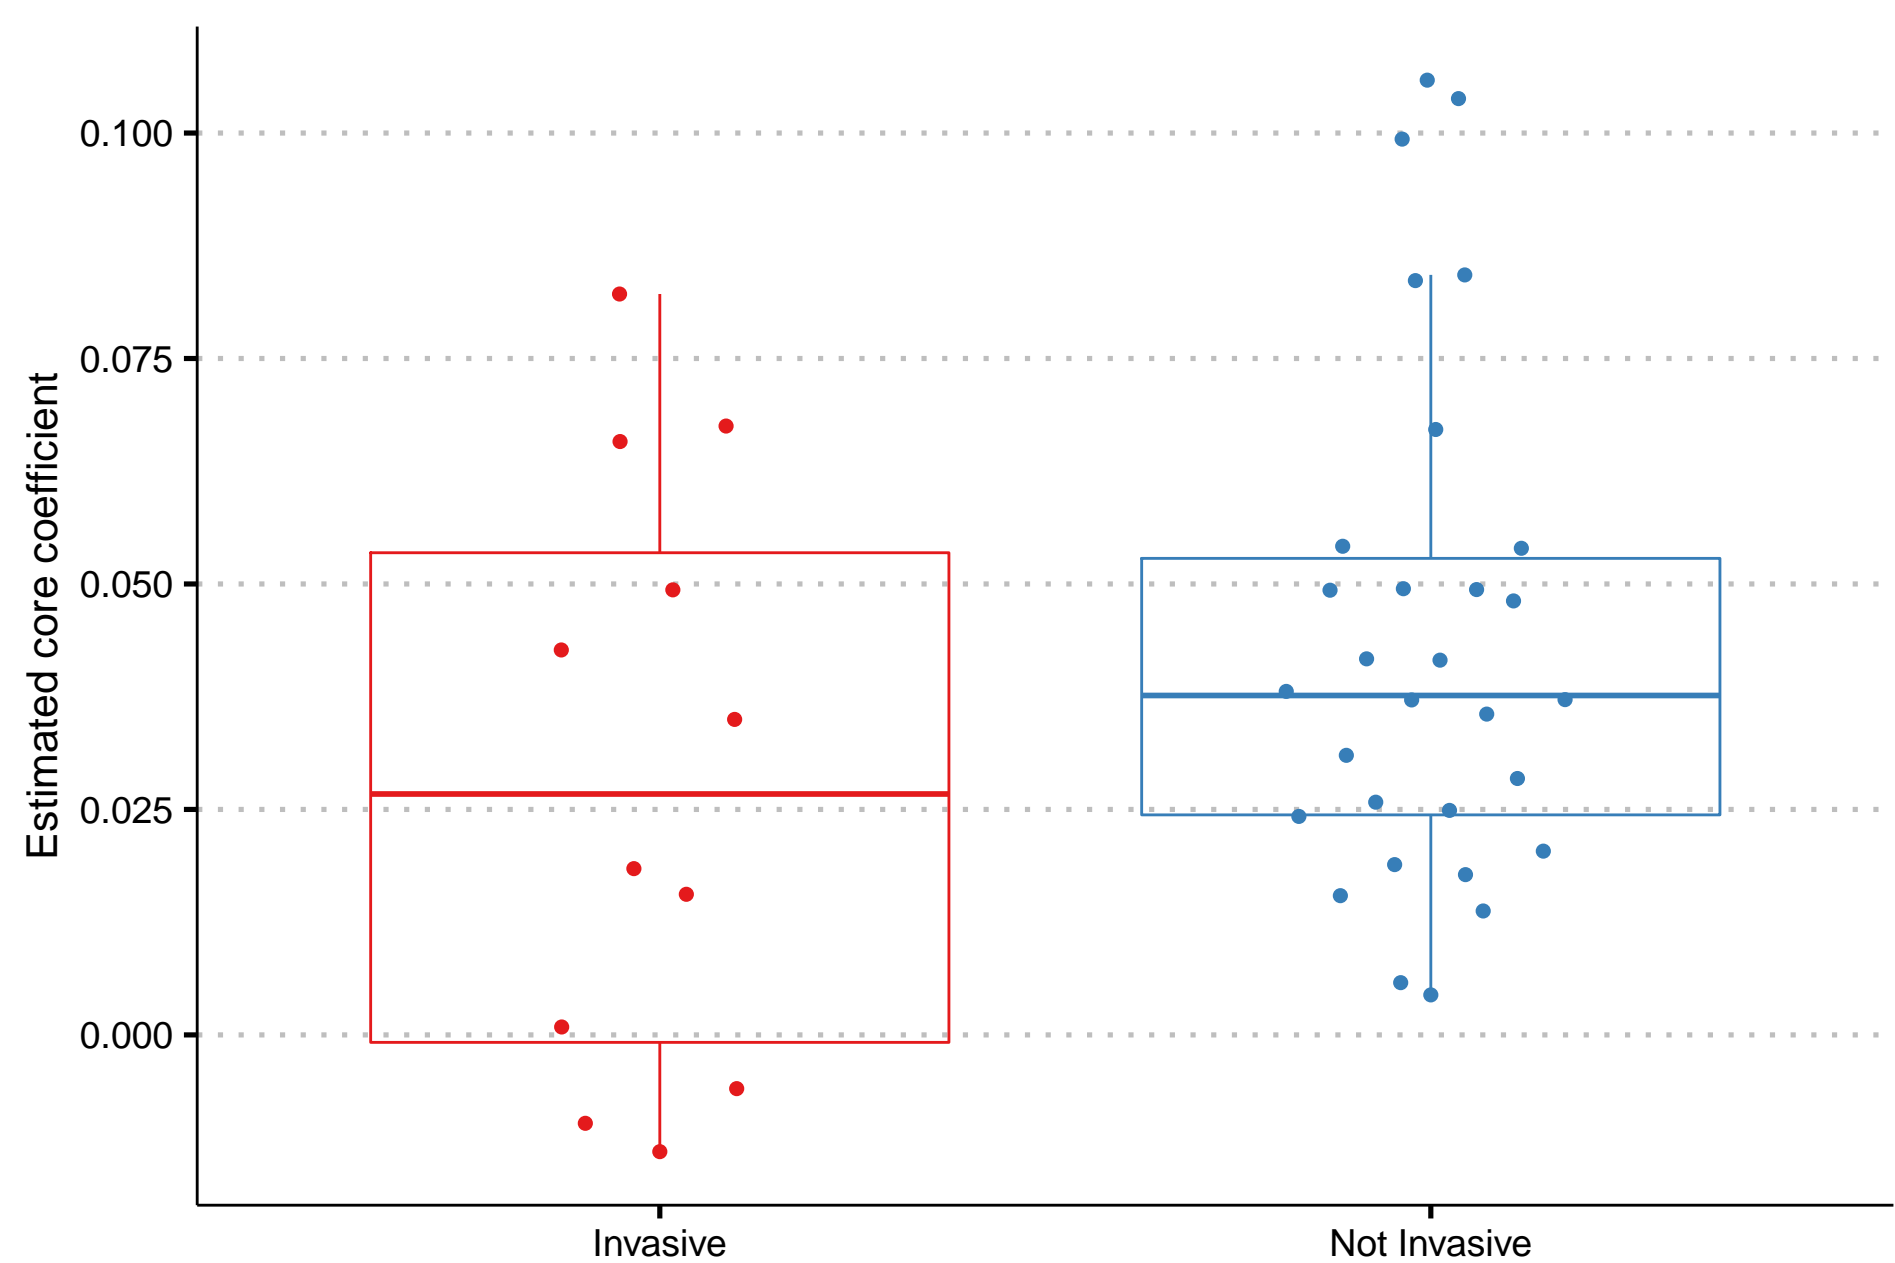

Supplement: Supplemental_Code_0.1.0.tar.gz.zip [file pneumo_core_estimate_boxplot.pdf › panstripe-manuscript-0.1.0/figures/pneumo_core_estimate_boxplot.pdf]

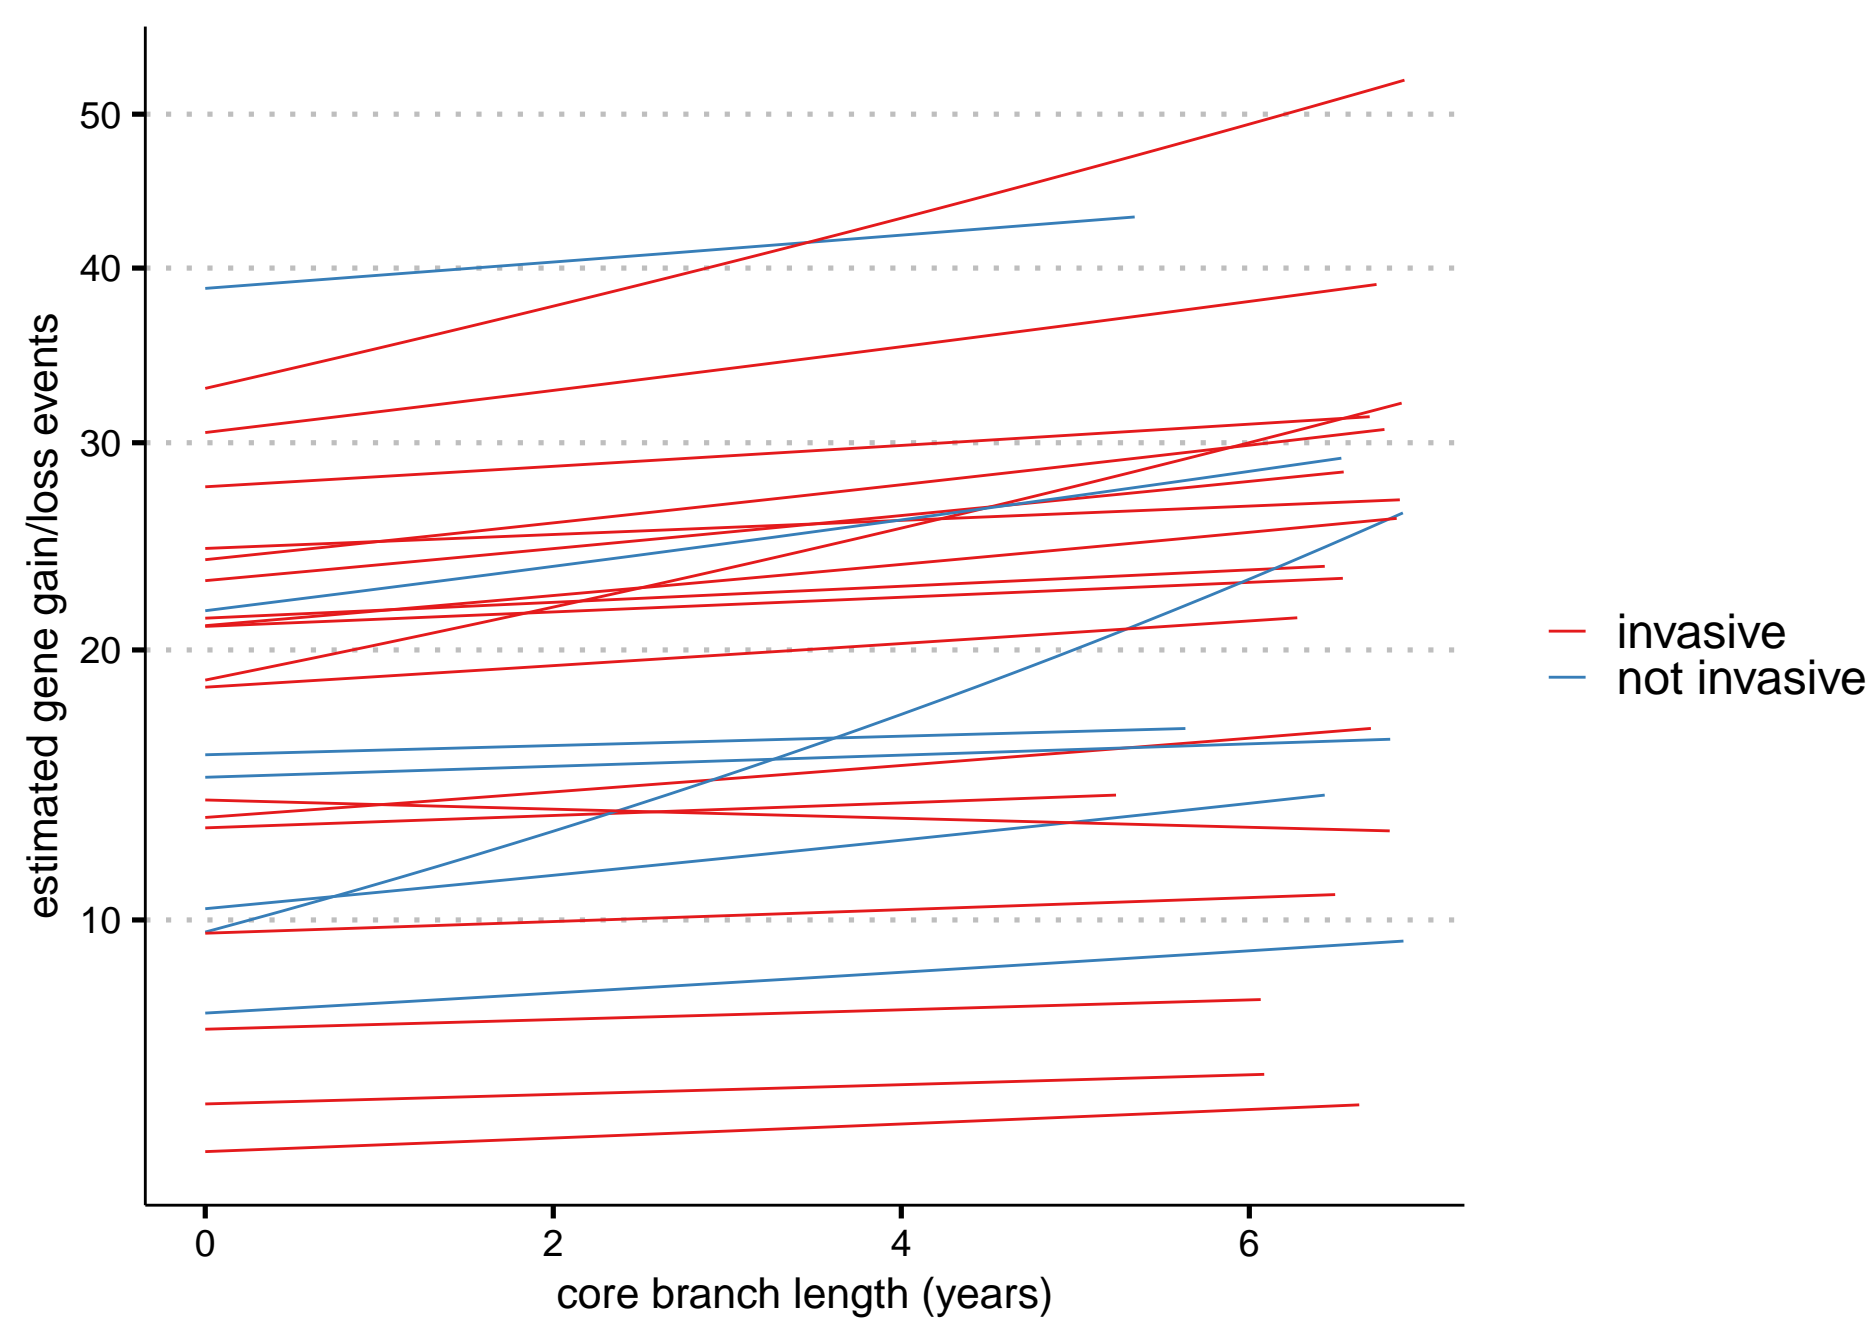

Supplement: Supplemental_Code_0.1.0.tar.gz.zip [file pneumo_panstripe_fits.pdf › panstripe-manuscript-0.1.0/figures/pneumo_panstripe_fits.pdf]

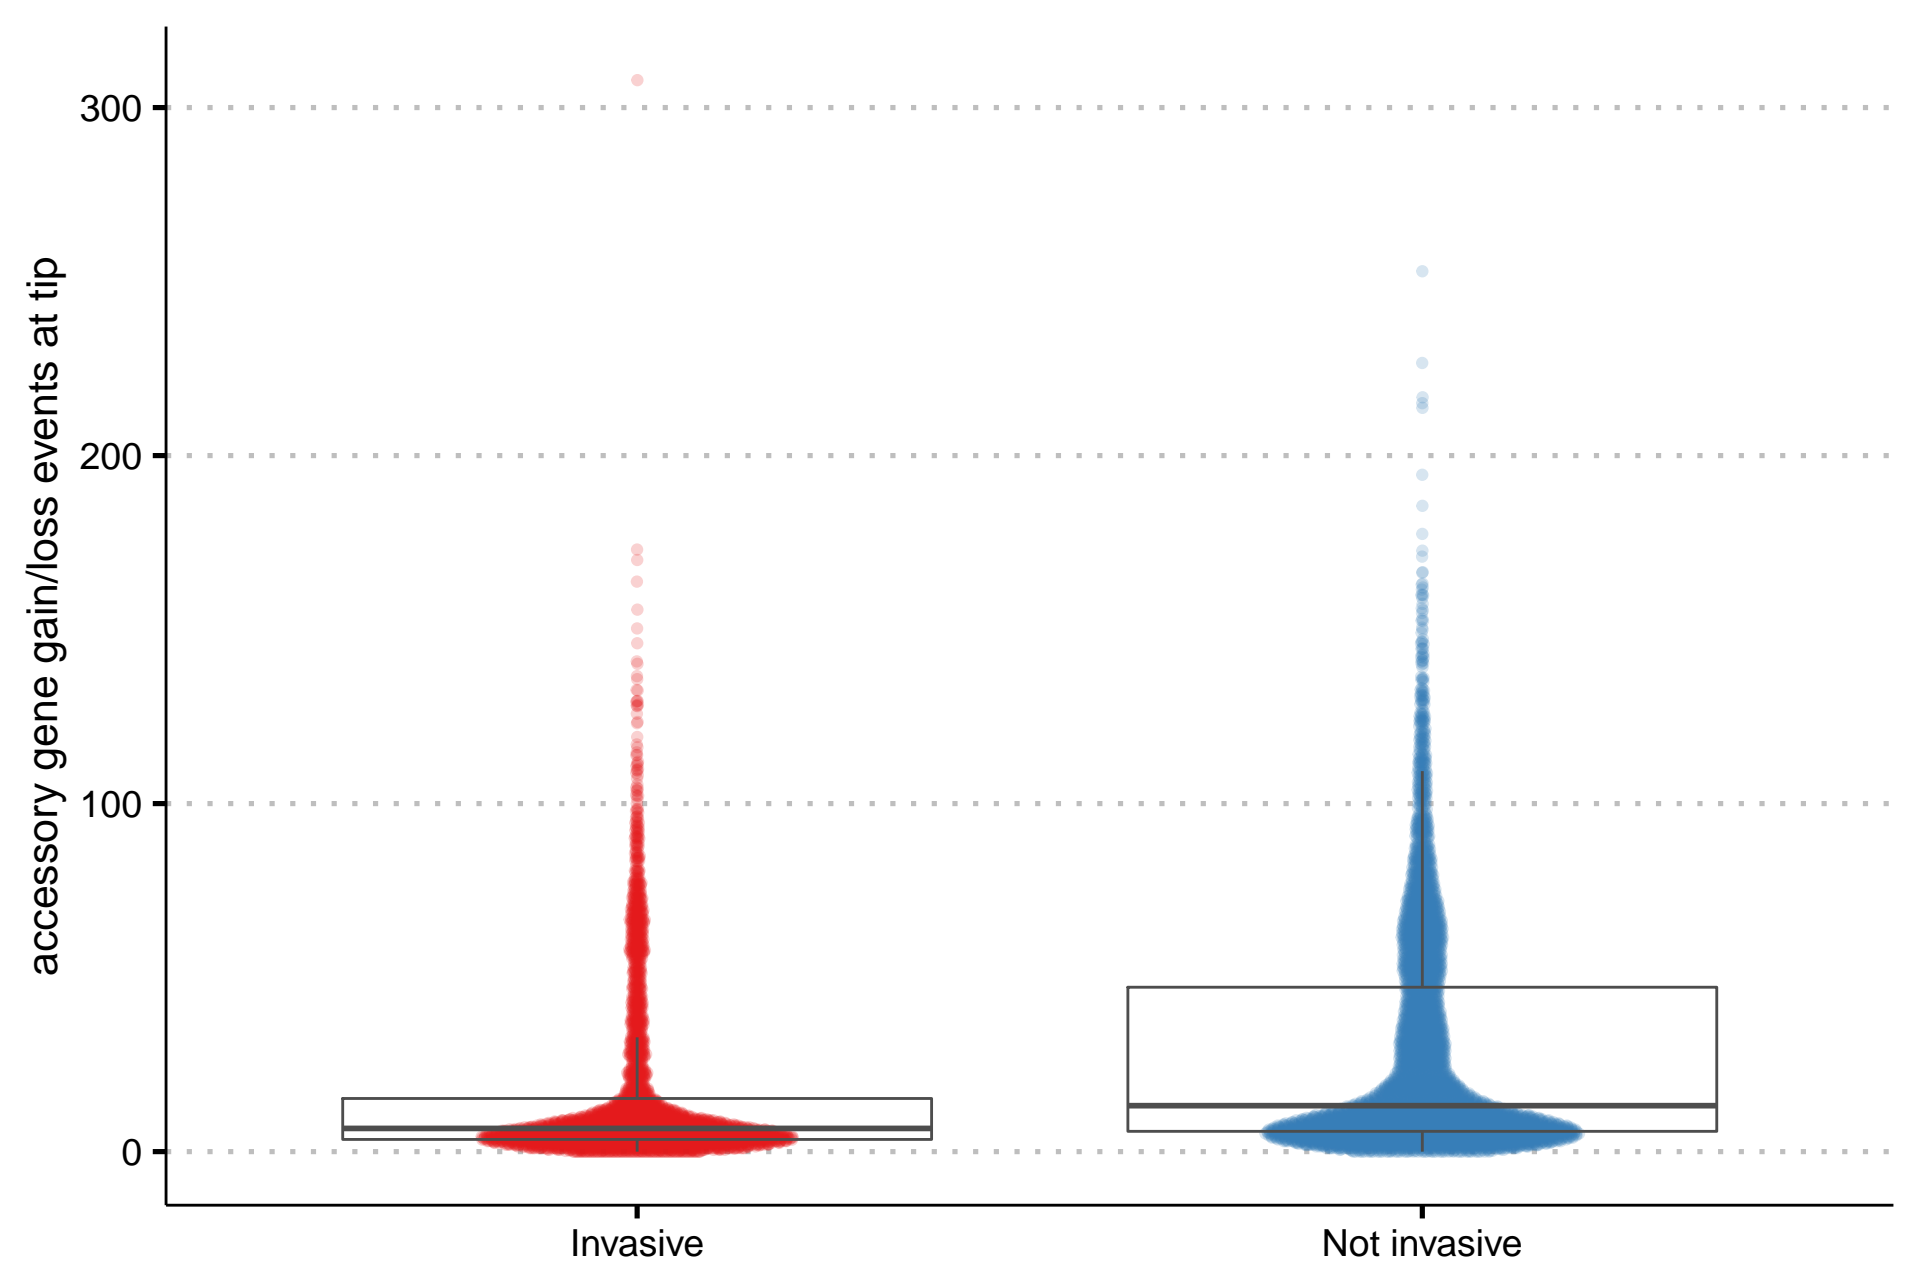

Supplement: Supplemental_Code_0.1.0.tar.gz.zip [file pneumo_tip_acc_count_histogram.pdf › panstripe-manuscript-0.1.0/figures/pneumo_tip_acc_count_histogram.pdf]

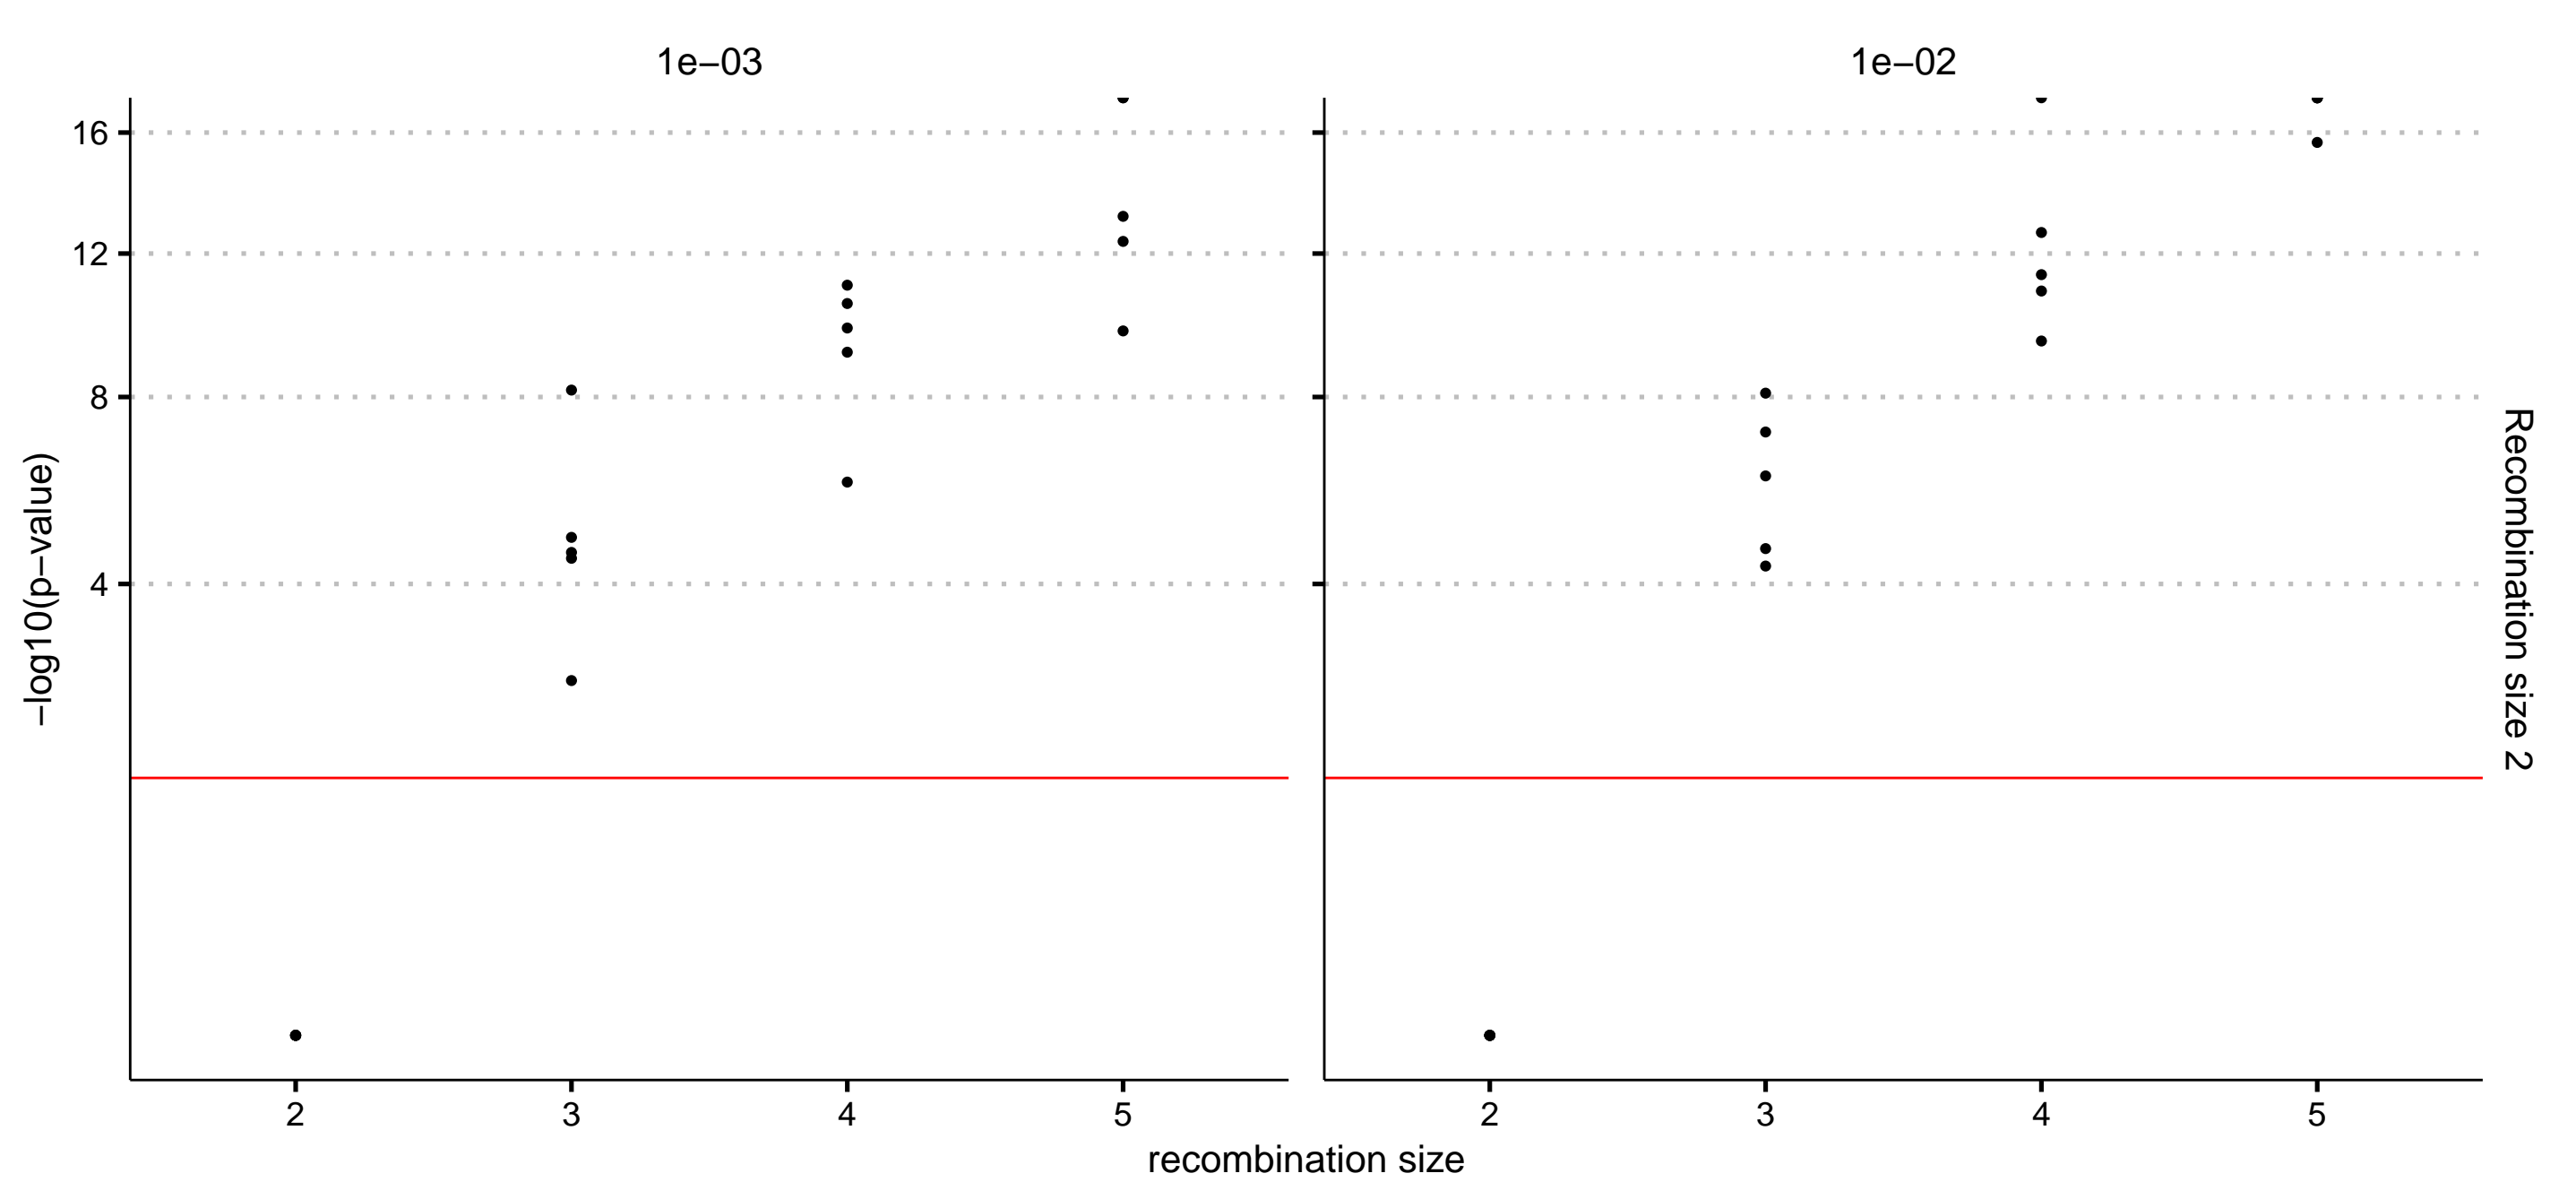

Supplement: Supplemental_Code_0.1.0.tar.gz.zip [file recombination_size_comparison.pdf › panstripe-manuscript-0.1.0/figures/recombination_size_comparison.pdf]

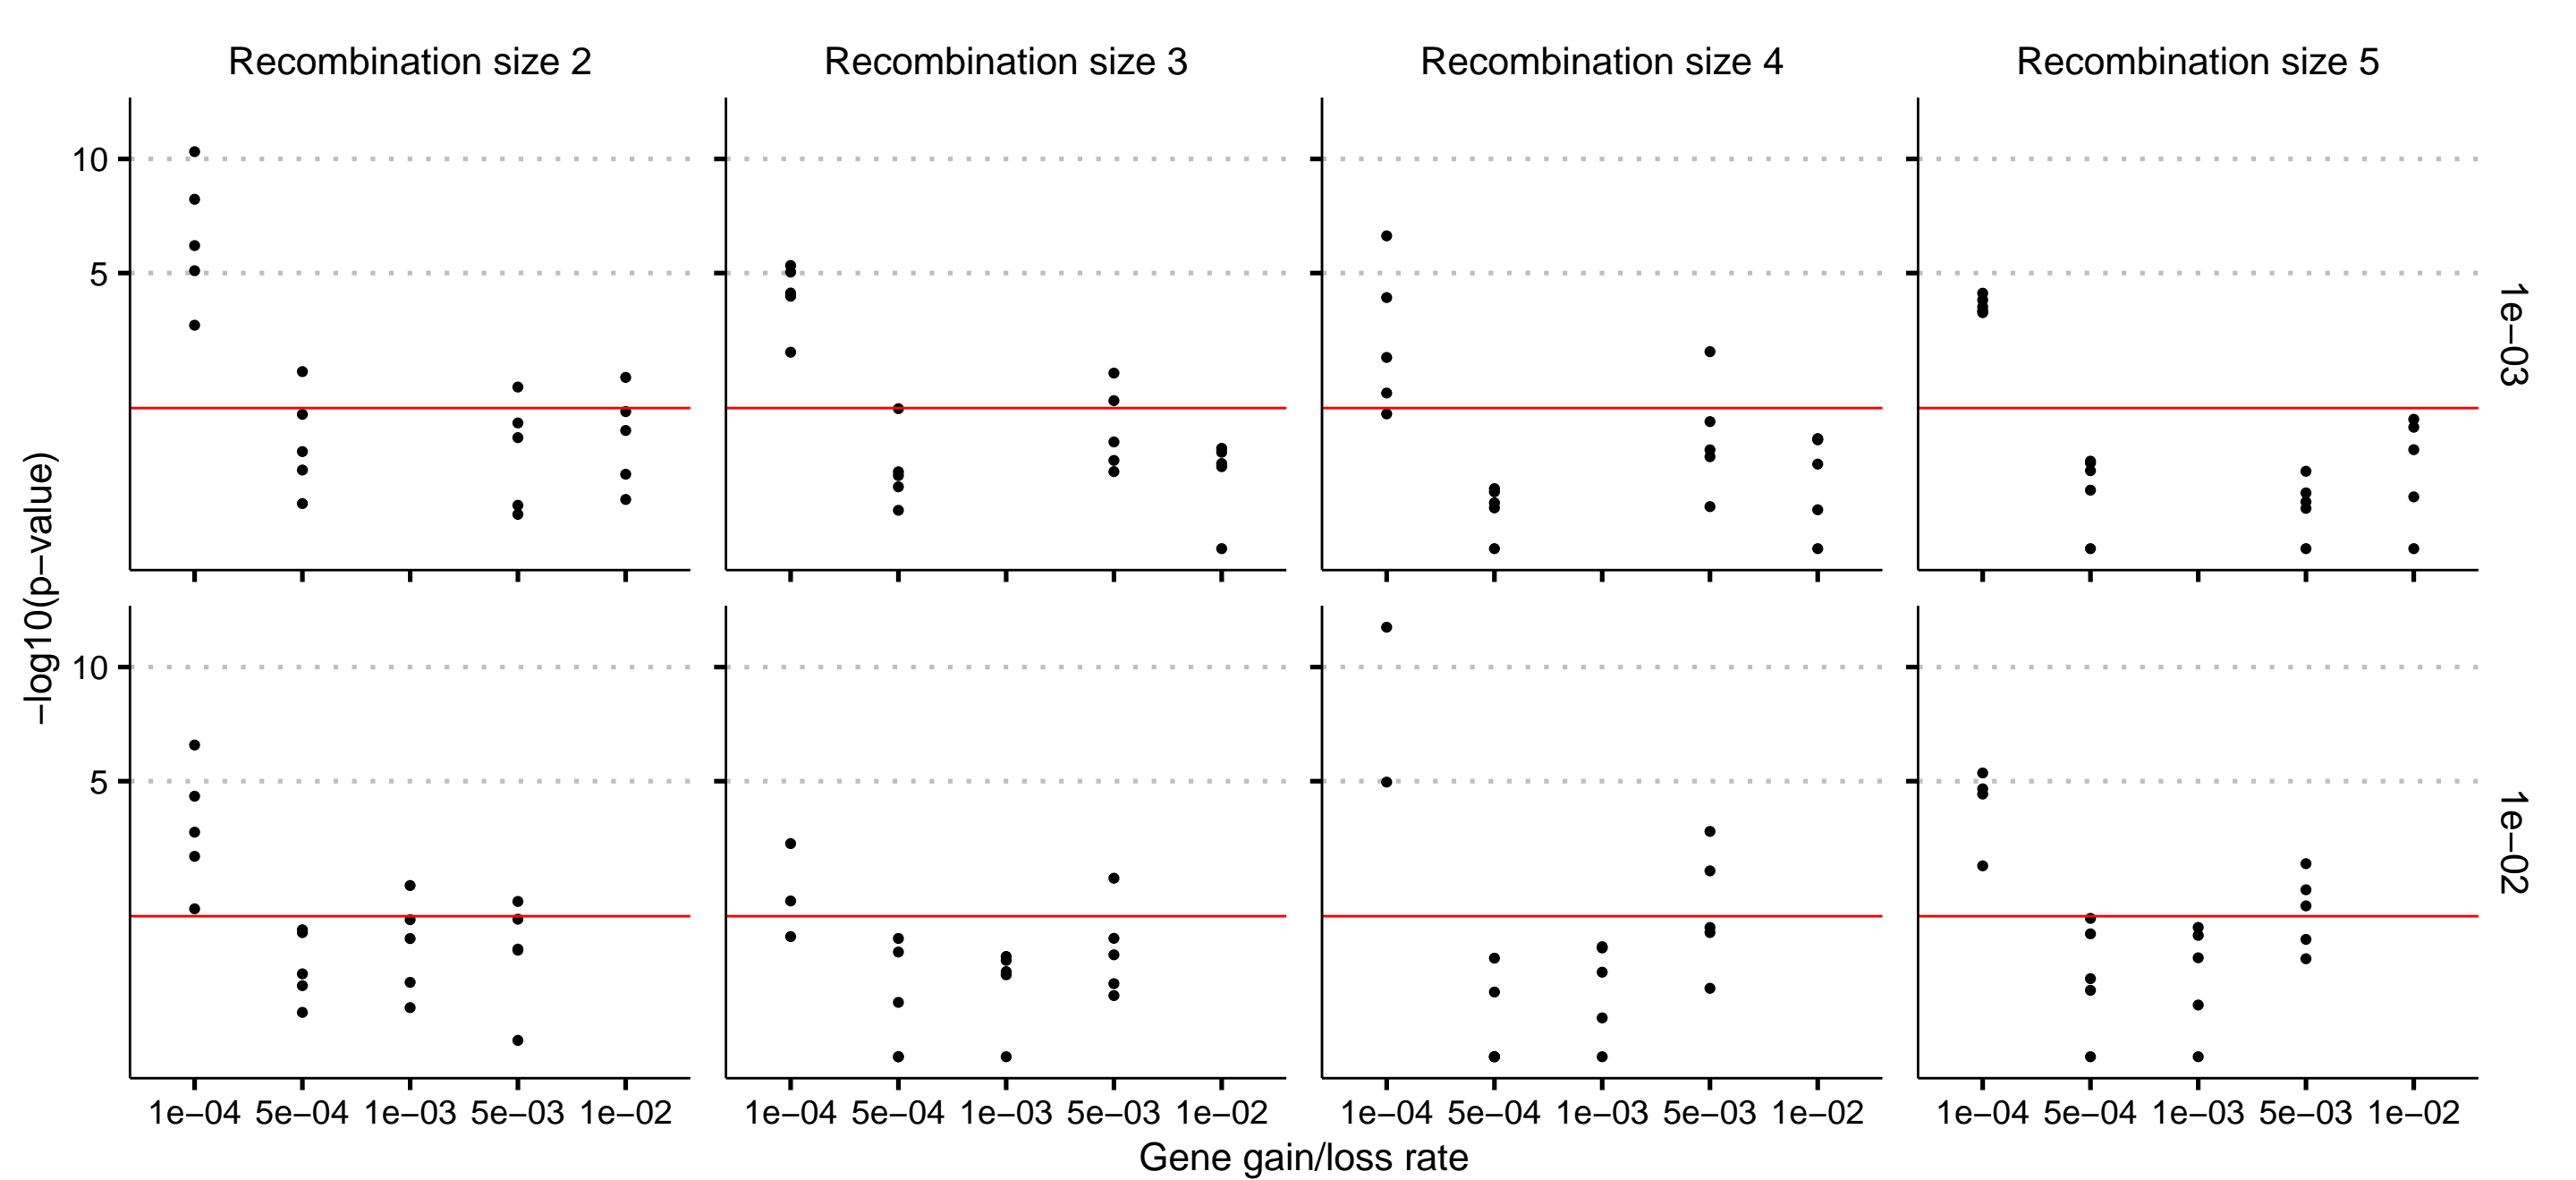

Supplement: Supplemental_Code_0.1.0.tar.gz.zip [file recombination_size_comparison_nochange.pdf › panstripe-manuscript-0.1.0/figures/recombination_size_comparison_nochange.pdf]
